# Supplementary material for: Genome-Wide Association Studies of Embryogenic Callus Induction Rate in Peanut (Arachis hypogaea L.)
Source: MDPI journal article supplement (doi:10.3390/genes15020160), 2024-01-26
Supplement: s1 [file s1]

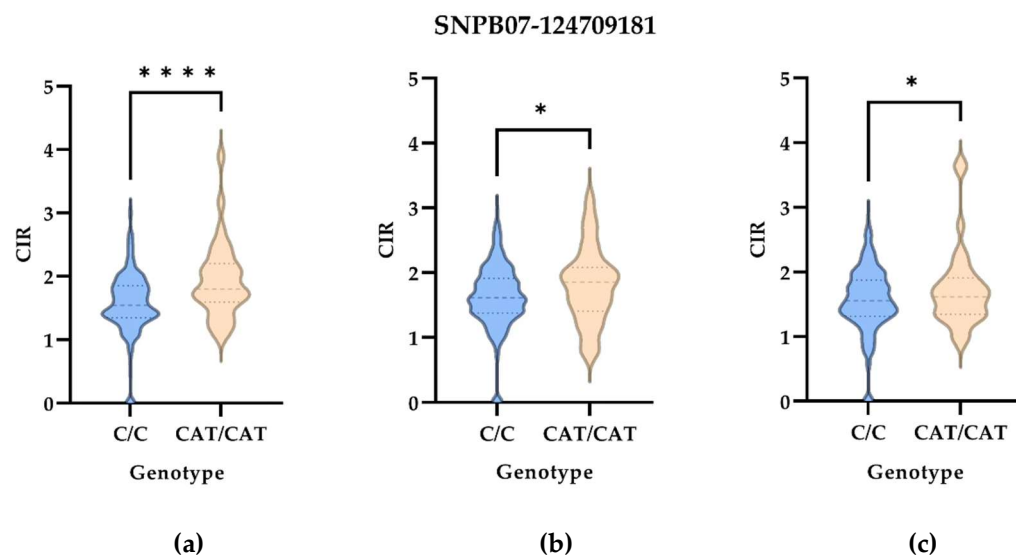

**Figure S1.** Linkage analysis of the peanut callus induction rate (CIR) with SNP at the T7 (a), T8 (b), and T9 (c) subcultures. \*  $p < 0.05$ . \*\*\*\*  $p < 0.0001$ .
