# Supplementary material for: Genome-Wide Association Studies of Embryogenic Callus Induction Rate in Peanut (Arachis hypogaea L.)
Source: Genes (Basel). 2024 Jan 26;15(2):160. doi: 10.3390/genes15020160 (PMC10887910; doi:10.3390/genes15020160)
Supplement: Supplementary file 1 [file genes-15-00160-s001.zip › Table S1.xlsx]

## Sheet: Sheet1
Table S1. Features and the CIR of 353 Arachys hypogaea subjected to whole genome resequencing.
Accession ID	Name	Accession number	Variant	Region	T7-CIR	T8-CIR	T9-CIR
N401	Bairizai	zh.h0190	Arachis.hypogaea.subsp.fastigiata.var.vulgaris	Guangdong, China	1.675	1.251	1.257
N402	Nenhua3	ND	Arachis.hypogaea.subsp.fastigiata.var.fastigiata	Heilongjiang, China	1.966	1.961	1.772
N404	TAIWAN KOTSUBU NO	PI 200441	Arachis.hypogaea.subsp.fastigiata.var.vulgaris	Japan	1.421	1.386	1.569
N405	117	PI 162655	Arachis.hypogaea.subsp.fastigiata.var.vulgaris	Uruguay	0	0	0
N406	Y135-241	ND	Arachis.hypogaea.irregular-fastigiata-type	Henan, China	0	0	0
N407	8710-0-0-4	ND	Arachis.hypogaea.subsp.hypogaea.var.hypogaea	Henan, China	1.294	1.729	2.005
N408	Fenghua5	GPDhuasheng(2019)370040	Arachis.hypogaea.irregular-hypogaea-type	Shandong, China	1.127	1.992	2.876
N409	Furonghuasheng	zh.h0136	Arachis.hypogaea.subsp.fastigiata.var.vulgaris	Hunan, China	NA	NA	NA
N410	Xinchengzao	Luzhongshenzidi0015	Arachis.hypogaea.irregular-fastigiata-type	Shandong, China	1.826	1.979	1.891
N411	UF71513	PI 590374	Arachis.hypogaea.subsp.fastigiata.var.fastigiata	America	NA	NA	NA
N412	Luhua3	zh.h1646	Arachis.hypogaea.irregular-fastigiata-type	Shandong, China	1.394	1.387	1.294
N413	Pronto	ND	Arachis.hypogaea.subsp.fastigiata.var.vulgaris	America	1.358	1.416	1.523
N414	Kangqing10	zh.h1643	Arachis.hypogaea.irregular-fastigiata-type	Shandong, China	NA	NA	NA
N415	Zhongliuqiu	zh.h0365	Arachis.hypogaea.subsp.fastigiata.var.vulgaris	Fujian, China	1.536	1.403	1.442
N417	Xiongyuelijingxiaohuasheng	zh.h0504	Arachis.hypogaea.subsp.fastigiata.var.vulgaris	Liaoning, China	1.389	1.347	0.792
N418	Shanyou199	GPDhuasheng(2018)440297	Arachis.hypogaea.subsp.fastigiata.var.vulgaris	Guangdong, China	1.438	1.368	1.373
N419	Guangxiliuchengzhenzhudou	zh.h0407	Arachis.hypogaea.irregular-fastigiata-type	Guangxi, China	1.4	2.25	1.875
N420	Wanhua4	Wanpinjiandengzidi0505003	Arachis.hypogaea.subsp.fastigiata.var.vulgaris	AnHui, China	1.747	2.051	1.725
N421	Gushizhilihuasheng	zh.h1687	Arachis.hypogaea.subsp.fastigiata.var.fastigiata	Henan, China	1.727	3.273	1.704
N422	Weihua9	Lunongshen2008034	Arachis.hypogaea.irregular-fastigiata-type	Shandong, China	1.013	1.476	1.496
N424	Puhua17	Yushenhua2002005	Arachis.hypogaea.irregular-fastigiata-type	Henan, China	1.441	1.739	1.634
N425	Yuhua14	Guoshenyou2002009	Arachis.hypogaea.irregular-fastigiata-type	Henan, China	1.636	1.8	1.663
N426	Taishanzhenzhudou	zh.h0364	Arachis.hypogaea.subsp.fastigiata.var.vulgaris	Guangdong, China	1.614	1.667	1.576
N427	Zhonghua5	Guoshenyou980003	Arachis.hypogaea.irregular-fastigiata-type	Hubei, China	1.813	1.01	1.715
N428	J24	ND	Arachis.hypogaea.irregular-hypogaea-type	India	1.704	2.343	1.765
N429	Guangxiyishanliupodou	zh.h0426	Arachis.hypogaea.subsp.fastigiata.var.vulgaris	Guangxi, China	1.547	1.307	1.561
N431	Funingduoli	zh.h0003	Arachis.hypogaea.subsp.fastigiata.var.fastigiata	Hebei, China	1.413	1.395	1.658
N432	Xinyangxiaoduoyun	ND	Arachis.hypogaea.subsp.fastigiata.var.vulgaris	Henan, China	1.917	1.641	1.454
N433	Pukehua3	GPDhuasheng(2018)410190	Arachis.hypogaea.irregular-hypogaea-type	Henan, China	1.248	1	1
N434	RCM 572	PI 493880	Arachis.hypogaea.subsp.fastigiata.var.fastigiata	Paraguay	1.732	2.003	1.738
N435	Beidayiwohou	zh.h0001	Arachis.hypogaea.subsp.fastigiata.var.fastigiata	Beijing, China	1.953	1.55	1.359
N436	Guangxiyulinzhudou	zh.h2078	Arachis.hypogaea.irregular-fastigiata-type	Guangxi, China	1.648	1.792	1.659
N437	Xiuyanxiaohuasheng	zh.h2179	Arachis.hypogaea.subsp.fastigiata.var.vulgaris	Liaoning, China	1.401	2.287	1.333
N438	BRA-016195	PI 497517	Arachis.hypogaea.subsp.fastigiata.var.fastigiata	Brazil	0	0	0
N439	Jin-4	zh.h0527	Arachis.hypogaea.subsp.fastigiata.var.vulgaris	Liaoning, China	1.77	1.724	1.806
N441	Huayu20	GPD(2018)370392	Arachis.hypogaea.irregular-fastigiata-type	Shandong, China	2.25	1.579	2.133
N442	412	PI 337293	Arachis.hypogaea.subsp.fastigiata.var.vulgaris	Brazil	1.557	1.534	1.391
N443	Tatui-76	PI 504614	Arachis.hypogaea.subsp.fastigiata.var.vulgaris	Colombia	1.397	1.425	1.367
N444	Shanhua10	GPDhuasheng(2019)370045	Arachis.hypogaea.irregular-fastigiata-type	Shandong, China	1.247	0.875	0.868
N445	Zaoxiaoqi	ND	Arachis.hypogaea.subsp.hypogaea.var.hypogaea	Guangdong, China	1.633	1.592	NA
N446	Lainongzao	zh.h2768	Arachis.hypogaea.irregular-hypogaea-type	Shandong, China	1.915	1.981	1.763
N447	Luhua12	Luzhongshenzidi0169	Arachis.hypogaea.subsp.fastigiata.var.vulgaris	Shandong, China	1.047	1.27	0.937
N448	15	PI 271019	Arachis.hypogaea.subsp.fastigiata.var.vulgaris	Zambia	NA	NA	NA
N449	Puyou2	ND	Arachis.hypogaea.subsp.fastigiata.var.vulgaris	Fujian, China	1.422	1.124	1.193
N450	Chico	ND	Arachis.hypogaea.subsp.fastigiata.var.vulgaris	America	NA	NA	NA
N451	132	PI 331297	Arachis.hypogaea.subsp.fastigiata.var.fastigiata	Argentina	2.458	2.054	1.821
N452	RCM 726	PI 494034	Arachis.hypogaea.subsp.fastigiata.var.vulgaris	Paraguay	1.41	1.646	1.403
N453	Yueyou256-2	Yueshenyou1991003	Arachis.hypogaea.subsp.fastigiata.var.vulgaris	Guangdong, China	2.671	2.347	1.623
N455	RCM 385	PI 493693	Arachis.hypogaea.subsp.fastigiata.var.fastigiata	Paraguay	1.372	1.676	1.556
N456	Turkestan B	PI 152146	Arachis.hypogaea.subsp.fastigiata.var.vulgaris	Uruguay	1.81	1.948	1.83
N457	Kaboko	PI 482120	Arachis.hypogaea.subsp.fastigiata.var.vulgaris	Zimbabwe	0.858	0.955	0.775
N458	Fuqing	ND	Arachis.hypogaea.subsp.fastigiata.var.vulgaris	Fujian, China	1.803	1.862	1.813
N459	Xiaoliuqiu	zh.h0366	Arachis.hypogaea.subsp.fastigiata.var.vulgaris	Fujian, China	1.284	1.282	1.251
N460	Yuexuan58	GPDhuasheng(2019)440102	Arachis.hypogaea.subsp.fastigiata.var.vulgaris	Guangdong, China	1.775	1.671	1.771
N461	Hongmeizao	zh.h0120	Arachis.hypogaea.subsp.fastigiata.var.vulgaris	Hubei, China	1.391	1.23	1.275
N462	RCM 630	PI 493938	Arachis.hypogaea.subsp.fastigiata.var.fastigiata	Paraguay	1.299	1.952	1.99
N463	Fenghua6	GPDhuasheng(2019)370041	Arachis.hypogaea.irregular-fastigiata-type	Shandong, China	1.027	1.163	1.747
N464	Taishansanlirou	zh.h0305	Arachis.hypogaea.subsp.fastigiata.var.vulgaris	Guangdong, China	NA	NA	NA
N465	Guangxifusuihongyihuasheng	zh.h2113	Arachis.hypogaea.subsp.fastigiata.var.vulgaris	Guangxi, China	1.339	1.078	1.112
N466	CC516	PI 288146	Arachis.hypogaea.subsp.fastigiata.var.vulgaris	India	NA	NA	NA
N467	Xianghuasheng1	zh.h1850	Arachis.hypogaea.subsp.fastigiata.var.vulgaris	Hunan, China	1.316	1.079	1.26
N468	CC488	PI 356004	Arachis.hypogaea.subsp.fastigiata.var.fastigiata	Argentina	1.708	2.159	2.063
N469	Quanhua327-9	Minshenyou2001001	Arachis.hypogaea.subsp.fastigiata.var.vulgaris	Fujian, China	1.888	1.853	2.181
N470	Yuhua1	ND	Arachis.hypogaea.irregular-hypogaea-type	Henan, China	2.155	2.116	1.346
N471	SB152	PI 268806	Arachis.hypogaea.subsp.fastigiata.var.vulgaris	Zambia	1.85	1.778	1.411
N472	Tongchenghuasheng	zh.h1763	Arachis.hypogaea.subsp.fastigiata.var.vulgaris	Hubei, China	2.041	1.776	2.027
N473	Yuhua9331	Yushenhua2004001	Arachis.hypogaea.irregular-hypogaea-type	Henan, China	1.778	2.207	1.647
N474	LE 39 ACEITERO FED	PI 155107	Arachis.hypogaea.subsp.fastigiata.var.vulgaris	Uruguay	1.435	1.602	2.042
N475	Shanhua8	GPDhuasheng(2019)370043	Arachis.hypogaea.irregular-fastigiata-type	Shandong, China	2.105	1.2	1.378
N476	Yiya	zh.h0283	Arachis.hypogaea.subsp.fastigiata.var.vulgaris	Guangdong, China	1.374	1.339	1.384
N477	Natal Common	PI 240560	Arachis.hypogaea.subsp.fastigiata.var.vulgaris	South Africa	1.05	1.01	NA
N478	Tanghua10	ND	Arachis.hypogaea.irregular-fastigiata-type	Hebei, China	2.208	1.895	3.784
N479	Georgia	zh.h3201	Arachis.hypogaea.subsp.fastigiata.var.fastigiata	America	1.957	1.357	2.25
N481	Kainong41	GPD(2018)410306	Arachis.hypogaea.irregular-hypogaea-type	Henan, China	2.068	1.27	1.942
N482	Yuhua16	Yushenzhengzidi21	Arachis.hypogaea.irregular-hypogaea-type	Henan, China	1.506	2.47	2.022
N483	CC408	PI 262038	Arachis.hypogaea.subsp.fastigiata.var.fastigiata	Brazil	1.5	1.618	1.057
N484	Heyou11	GPDhuasheng(2018)450304	Arachis.hypogaea.subsp.fastigiata.var.vulgaris	Guangxi, China	1.569	1.264	1.25
N485	Yuhua12	Yushenzhengzidi9912	Arachis.hypogaea.subsp.fastigiata.var.vulgaris	Henan, China	0.839	1.375	0.973
N486	Yueyou551	Guishenzhengzidi096	Arachis.hypogaea.subsp.fastigiata.var.vulgaris	Guangdong, China	1.863	1.451	0.562
N487	Xihuaxiaozibai	zh.h1049	Arachis.hypogaea.subsp.hypogaea.var.hypogaea	Henan, China	0.641	1.806	0.971
N488	Shanhua9	GPDhuasheng(2019)370044	Arachis.hypogaea.irregular-hypogaea-type	Shandong, China	1.854	1.833	1.763
N489	Yuhua9719	GPDhuasheng(2018)410131	Arachis.hypogaea.irregular-hypogaea-type	Henan, China	1.754	1.836	1.349
N490	Weihua6	Lunongshenzi[2001]018	Arachis.hypogaea.irregular-hypogaea-type	Shandong, China	1.212	1.192	1.771
N491	Zhenpingdayanghuasheng	zh.h2210	Arachis.hypogaea.subsp.hypogaea.var.hirsuta	Henan, China	1.948	2.089	2.302
N492	Fengqiuyibazhua	zh.h1039	Arachis.hypogaea.subsp.hypogaea.var.hypogaea	Henan, China	1.314	1.249	0.885
N493	Taihua6	GPDhuasheng(2018)320307	Arachis.hypogaea.irregular-fastigiata-type	Jiangsu, China	2.049	2.511	2.534
N495	K 703-80	PI 476432	Arachis.hypogaea.irregular-fastigiata-type	Nigeria	0	0	0
N496	CC223	PI 290620	Arachis.hypogaea.subsp.hypogaea.var.hypogaea	Argentina	1.417	1.458	1.593
N497	Xuxi1	zh.h1410	Arachis.hypogaea.irregular-fastigiata-type	Jiangsu, China	2.5	3.1	1.516
N498	Yuanza6	GPDhuasheng(2018)410070	Arachis.hypogaea.irregular-fastigiata-type	Henan, China	0	0	0
N499	Dalifu	zh.h1682	Arachis.hypogaea.irregular-hypogaea-type	Henan, China	0.75	0.833	0.922
N500	1318-6	PI 343384	Arachis.hypogaea.subsp.hypogaea.var.hypogaea	Israel	1.207	1.687	1.388
N501	Yuhua29	GPDhuasheng(2020)410063	Arachis.hypogaea.irregular-hypogaea-type	Henan, China	1.283	1.95	1.489
N502	Taihua3	Guoshenyou2002010	Arachis.hypogaea.irregular-hypogaea-type	Jiangsu, China	1.395	2.136	1.9
N503	Zhongmoutuoyang(3)	ND	Arachis.hypogaea.irregular-hypogaea-type	Henan, China	2.056	1.859	1.594
N505	RCM 239	PI 493547	Arachis.hypogaea.subsp.fastigiata.var.fastigiata	Brazil	1.875	1.431	1.353
N506	Yongchengxiaomake	zh.h0558	Arachis.hypogaea.subsp.hypogaea.var.hirsuta	Henan, China	1.008	1.346	1.387
N507	Pakistan	ND	Arachis.hypogaea.subsp.hypogaea.var.hirsuta	Pakistan	1.433	1.617	1.3
N508	Nanchonghongbaihuasheng	zh.h1705	Arachis.hypogaea.subsp.hypogaea.var.hypogaea	Sichuan, China	0.477	2.667	1.214
N509	Yuhua25	GPDhuasheng(2018)410127	Arachis.hypogaea.irregular-hypogaea-type	Henan, China	1.939	1.959	1.737
N510	Yuhua6	Yushenzhengzidi9313	Arachis.hypogaea.irregular-hypogaea-type	Henan, China	2.659	2.529	1.864
N511	Luofu6	zh.h0112	Arachis.hypogaea.irregular-hypogaea-type	Sichuan, China	1.847	2.112	2.219
N512	Hua17	zh.h0863	Arachis.hypogaea.subsp.hypogaea.var.hypogaea	Shandong, China	1.089	1.413	1.991
N514	Quanhua8	Minrenyou2006004	Arachis.hypogaea.subsp.fastigiata.var.vulgaris	Fujian, China	1.047	1.095	1.539
N516	Kaifengyicuoyang(2)	zh.h2460	Arachis.hypogaea.irregular-hypogaea-type	Henan, China	1.577	1.589	0.776
N517	NcAc17090	w.h2817	Arachis.hypogaea.subsp.fastigiata.var.peruviana	America	1.871	2.568	1.589
N518	Yuanza0025	Guopinjian2013005	Arachis.hypogaea.irregular-hypogaea-type	Henan, China	1.5	4.873	1.878
N521	Liuhangxiaohuasheng	zh.h1083	Arachis.hypogaea.subsp.hypogaea.var.hypogaea	Henan, China	1.191	1.378	0.984
N523	Zhanyou62	Yueshenyou2003001	Arachis.hypogaea.subsp.fastigiata.var.vulgaris	Guangdong, China	1.556	1.556	1.929
N524	Fleur11	ND	Arachis.hypogaea.subsp.fastigiata.var.vulgaris	Senegal	1.376	1.74	1.746
N525	Toksun	ND	Arachis.hypogaea.subsp.hypogaea.var.hypogaea	Xinjiang, China	1.259	2.024	1.102
N526	Jinhua7	Jinshenhua(Ren)2010001	Arachis.hypogaea.irregular-hypogaea-type	Shanxi, China	1.571	2.105	1.722
N527	Rubut33-1	ND	Arachis.hypogaea.subsp.hypogaea.var.hypogaea	India	2.222	1.23	2.327
N528	Zheng8159-1	ND	Arachis.hypogaea.irregular-hypogaea-type	Henan, China	2.087	2.064	1.322
N529	Guihuahong35	ND	Arachis.hypogaea.subsp.fastigiata.var.vulgaris	Guangxi, China	1.777	2.027	0.973
N530	ICGS 45	PI 478819	Arachis.hypogaea.subsp.fastigiata.var.vulgaris	India	2.397	1.497	1.498
N531	Kainong8598	GPDhuasheng(2018)410270	Arachis.hypogaea.irregular-fastigiata-type	Henan, China	1.125	1	1.5
N532	Lankaosansili	zh.h0552	Arachis.hypogaea.subsp.hypogaea.var.hirsuta	Henan, China	1.138	1.687	1.061
N534	Hua28	zh.h1403	Arachis.hypogaea.irregular-hypogaea-type	Shandong, China	0.96	1.85	2.185
N535	Yueyou92	Yueshenyou1986003	Arachis.hypogaea.subsp.fastigiata.var.vulgaris	Guangdong, China	1.46	1.756	1.396
N536	Shandonghunxuan1	ND	Arachis.hypogaea.irregular-hypogaea-type	Shandong, China	1.644	1.123	1.626
N537	Fuhua6	Minrenyou2011001	Arachis.hypogaea.subsp.fastigiata.var.vulgaris	Fujian, China	1.336	1.568	1.308
N538	Yuhua9840	Yushenhua2008002	Arachis.hypogaea.irregular-hypogaea-type	Henan, China	1.49	1.484	1.313
N539	Sanmenxiayibazhua	zh.h1032	Arachis.hypogaea.subsp.hypogaea.var.hypogaea	Henan, China	1.604	1.418	1.315
N540	Xinhua1	GPDhuasheng(2019)410089	Arachis.hypogaea.irregular-hypogaea-type	Henan, China	1.329	2.742	1.744
N541	Shannong226	ND	Arachis.hypogaea.irregular-hypogaea-type	Shandong, China	1.796	1.662	1.7
N542	Puhua16	Yushenhua2002004	Arachis.hypogaea.irregular-hypogaea-type	Henan, China	2.045	1.958	2.304
N543	US 331	PI 475918	Arachis.hypogaea.subsp.fastigiata.var.fastigiata	Bolivia	3	2.333	2.375
N544	Wengyuandagoudou	zh.h2383	Arachis.hypogaea.subsp.fastigiata.var.fastigiata	Guangdong, China	1.786	2.143	2.286
N545	Yuhuahei1	Yushenhua2006003	Arachis.hypogaea.irregular-hypogaea-type	Henan, China	2.007	2.032	1.753
N546	Yuhua9830	Yushenhua2010007	Arachis.hypogaea.irregular-hypogaea-type	Henan, China	2	2.158	2.19
N547	Qianhuasheng2	QIanshenyou2006007	Arachis.hypogaea.irregular-fastigiata-type	Guizhou, China	1.829	2.353	2.722
N548	RCM 48	PI 493356	Arachis.hypogaea.subsp.fastigiata.var.fastigiata	Paraguay	1.782	1.745	1.372
N549	RCM 409	PI 493717	Arachis.hypogaea.subsp.fastigiata.var.fastigiata	Paraguay	1.343	1.541	1.289
N550	Luhua8	Luzhongshenzidi0082	Arachis.hypogaea.irregular-fastigiata-type	Shandong, China	1.539	2.12	1.787
N551	Yueyou52	Yueshenyou2012005	Arachis.hypogaea.subsp.fastigiata.var.vulgaris	Guangdong, China	1.38	0.99	1.023
N553	CC342	PI 298854	Arachis.hypogaea.subsp.fastigiata.var.vulgaris	South Africa	1.042	2.75	2.017
N554	Yueyou33	zh.h0347	Arachis.hypogaea.subsp.fastigiata.var.vulgaris	Guangdong, China	1.448	1.337	1.221
N555	Tianfu15	Guozhongjian2005002	Arachis.hypogaea.irregular-hypogaea-type	Sichuan, China	1.307	1.606	1.454
N556	Sanfu	zh.h0481	Arachis.hypogaea.irregular-hypogaea-type	Guangxi, China	2.617	2.053	2.096
N557	CC553	PI 157542	Arachis.hypogaea.subsp.hypogaea.var.hypogaea	Jiangxi, China	1.084	1.437	1.561
N558	Jixianyibazhua(2)	zh.h1686	Arachis.hypogaea.irregular-hypogaea-type	Henan, China	1.659	1.738	1.508
N559	CC740	PI 407667	Arachis.hypogaea.subsp.fastigiata.var.vulgaris	Thailand	NA	NA	NA
N561	Shinan3	zh.h0358	Arachis.hypogaea.subsp.fastigiata.var.vulgaris	Guangdong, China	1.632	1.509	1.506
N562	Huangchuangzhigan(2)	zh.h1684	Arachis.hypogaea.irregular-hypogaea-type	Henan, China	1.258	1.469	0.597
N563	101	PI 313129	Arachis.hypogaea.subsp.hypogaea.var.hirsuta	Taiwan	2.227	2.063	1.273
N564	RCM 421	PI 493729	Arachis.hypogaea.subsp.fastigiata.var.fastigiata	Paraguay	1.606	1.657	1.724
N565	BMP42	PI 270998	Arachis.hypogaea.subsp.fastigiata.var.vulgaris	Zambia	1.125	1.484	1.372
N566	Taihua4	GPDhuasheng(2020)320120	Arachis.hypogaea.irregular-hypogaea-type	Jiangsu, China	1.946	1.897	1.46
N567	Ehua3	zh.h1416	Arachis.hypogaea.irregular-fastigiata-type	Hubei, China	NA	NA	NA
N568	Puhua1	GPDhuasheng(2018)350082	Arachis.hypogaea.subsp.fastigiata.var.vulgaris	Fujian, China	1.321	0.747	0.55
N569	Qianhuasheng4	Guopinjian2006006	Arachis.hypogaea.subsp.fastigiata.var.vulgaris	Guizhou, China	1.042	1	0.75
N570	Jihua7	GPDhuasheng(2018)130095	Arachis.hypogaea.irregular-fastigiata-type	Hebei, China	0	0	0
N572	Ganhua2881	ND	Arachis.hypogaea.subsp.fastigiata.var.vulgaris	Jiangxi, China	2.385	2.265	2.116
N574	Kainong37	Yushenhua2003003	Arachis.hypogaea.irregular-hypogaea-type	Henan, China	1.999	1.728	1.61
N575	Yueyou22	zh.h0345	Arachis.hypogaea.subsp.fastigiata.var.vulgaris	Guangdong, China	1.819	1.85	1.639
N576	BC205	PI 268696	Arachis.hypogaea.subsp.fastigiata.var.vulgaris	South Africa	1.72	2.003	1.368
N577	Wanhua5	Wanpinjiandengzidi0505004	Arachis.hypogaea.irregular-hypogaea-type	AnHui, China	1.744	1.91	1.901
N579	Fancuntuoyang	ND	Arachis.hypogaea.irregular-hypogaea-type	Henan, China	2.117	0.776	0.91
N580	Yuhua10	Guoshenyou20000008	Arachis.hypogaea.irregular-hypogaea-type	Henan, China	2.736	2.66	1.684
N581	Wanhua7	ND	Arachis.hypogaea.irregular-hypogaea-type	AnHui, China	1.971	1.659	1.432
N583	Dapigu	zh.h0367	Arachis.hypogaea.subsp.fastigiata.var.vulgaris	Fujian, China	1.377	1	1.15
N585	Jinhua3	ND	Arachis.hypogaea.irregular-hypogaea-type	Shanxi, China	1.732	1.854	1.731
N586	Yuanza5	Yushenhua2013006	Arachis.hypogaea.irregular-fastigiata-type	Henan, China	1.674	1.57	1.723
N589	CC189	PI 339960	Arachis.hypogaea.subsp.fastigiata.var.fastigiata	Argentina	2.034	2.345	1.418
N590	Yuhua22	GPDhuasheng(2018)410125	Arachis.hypogaea.irregular-fastigiata-type	Henan, China	1.423	1.97	1.617
N591	Tianfu4	zh.h0107	Arachis.hypogaea.irregular-hypogaea-type	Sichuan, China	1.376	1.425	0.92
N592	Guihuahong166	ND	Arachis.hypogaea.subsp.fastigiata.var.vulgaris	Guangxi, China	1.438	1.594	1.264
N593	WHITE SPANISH 32	PI 337399	Arachis.hypogaea.subsp.fastigiata.var.vulgaris	Morocco	1.58	1.284	1.303
N594	Zhuputuoyanghuasheng	zh.h1029	Arachis.hypogaea.subsp.hypogaea.var.hypogaea	Henan, China	1.353	1.58	1.381
N595	Hua37	zh.h1400	Arachis.hypogaea.irregular-hypogaea-type	Shandong, China	1.815	1.346	1.423
N596	Heyou12	GPDhuasheng(2018)450317	Arachis.hypogaea.subsp.fastigiata.var.vulgaris	Guangxi, China	1.38	1.407	1.256
N597	Wuyou7	Guishenyou200004	Arachis.hypogaea.subsp.fastigiata.var.vulgaris	Guangxi, China	1.519	1.557	1.466
N598	Pukehua15	Yushenhua2005001	Arachis.hypogaea.irregular-hypogaea-type	Henan, China	1.366	2.068	2.199
N600	Hundafu12	zh.h0109	Arachis.hypogaea.subsp.hypogaea.var.hypogaea	Sichuan, China	1.219	1.16	1.252
N601	Mative	PI 481795	Arachis.hypogaea.subsp.fastigiata.var.vulgaris	Mozambique	1.326	1.845	1.356
N602	31/7/28	PI 471954	Arachis.hypogaea.irregular-fastigiata-type	Zimbabwe	2.05	1.375	2.208
N603	Nanzhaobutuoyang	zh.h1052	Arachis.hypogaea.subsp.hypogaea.var.hypogaea	Henan, China	NA	NA	NA
N604	Tianfu14	Guoshenyou2002017	Arachis.hypogaea.irregular-hypogaea-type	Sichuan, China	1.074	1.729	1.566
N605	Rudongwanerqing	zh.h1101	Arachis.hypogaea.subsp.hypogaea.var.hypogaea	Jiangsu, China	1.106	1.49	1.103
N606	Jiyou4	ND	Arachis.hypogaea.irregular-hypogaea-type	Hebei, China	2.212	2.061	1.801
N607	Kainong30	Guoshenyou2002012	Arachis.hypogaea.irregular-hypogaea-type	Henan, China	1.443	1.776	1.467
N608	NO 15233	PI 259617	Arachis.hypogaea.subsp.fastigiata.var.fastigiata	Cuba	1.417	1.863	2.521
N609	Quanhua6	Minrenyou2008001	Arachis.hypogaea.subsp.fastigiata.var.vulgaris	Fujian, China	1.318	1.674	1.43
N610	Guihuahong95	(Gui)Shen(You)2008019	Arachis.hypogaea.subsp.fastigiata.var.fastigiata	Guangxi, China	NA	NA	NA
N613	Kasawaira	PI 482189	Arachis.hypogaea.subsp.fastigiata.var.fastigiata	Zimbabwe	NA	NA	NA
N614	Nanyanghuasheng	zh.h1028	Arachis.hypogaea.subsp.hypogaea.var.hirsuta	Henan, China	2.5	1.071	1.615
N615	I.E.E.A. 3	PI 494018	Arachis.hypogaea.subsp.fastigiata.var.vulgaris	Brazil	2.064	1.362	NA
N616	Yuhua4	Yushenzhengzidi910021	Arachis.hypogaea.irregular-hypogaea-type	Henan, China	1.353	2.609	1.323
N618	US 55	PI 468250	Arachis.hypogaea.subsp.fastigiata.var.fastigiata	Bolivia	1.85	2.009	1.861
N619	Kai51-2	ND	Arachis.hypogaea.irregular-hypogaea-type	Henan, China	2.492	2.367	3.786
N620	Jiyou6	ND	Arachis.hypogaea.irregular-hypogaea-type	Hebei, China	1.449	1.915	2.015
N621	Yuhua9805	Guopinjian2013007	Arachis.hypogaea.irregular-hypogaea-type	Henan, China	1.094	1.943	1.981
N622	287/63	PI 429420	Arachis.hypogaea.subsp.fastigiata.var.fastigiata	Zimbabwe	1.633	1.111	1.976
N623	Dayuhuasheng	ND	Arachis.hypogaea.subsp.hypogaea.var.hypogaea	Henan, China	1.733	1.524	1.549
N624	Xiongluo9	zh.h2224	Arachis.hypogaea.subsp.hypogaea.var.hirsuta	Sichuan, China	0.475	0.784	1.5
N625	Rugaoxiyangsheng	zh.h1127	Arachis.hypogaea.subsp.hypogaea.var.hirsuta	Jiangsu, China	2.398	1.853	1.816
N626	1066-20	PI 319768	Arachis.hypogaea.subsp.hypogaea.var.hypogaea	Israel	1.799	2.441	1.954
N627	41-48	PI 196622	Arachis.hypogaea.subsp.hypogaea.var.hypogaea	Ivory Coast	1.962	1.819	1.606
N628	CC230	PI 290594	Arachis.hypogaea.subsp.hypogaea.var.hypogaea	India	2.29	2.198	1.622
N629	Almacenado sin cascara	PI 355268	Arachis.hypogaea.subsp.hypogaea.var.hypogaea	Mexico	NA	NA	NA
N630	US 619	PI 497318	Arachis.hypogaea.subsp.hypogaea.var.hypogaea	Bolivia	1.404	1.409	1.209
N631	Changrenpenglaizao	ND	Arachis.hypogaea.subsp.hypogaea.var.hypogaea	Shandong, China	1.047	0.932	1.18
N632	Fenglaiyiwohou	zh.h0789	Arachis.hypogaea.subsp.hypogaea.var.hypogaea	Shandong, China	1.65	1.645	1.544
N633	Kaifengdatuoyang	zh.h2477	Arachis.hypogaea.subsp.hypogaea.var.hypogaea	Henan, China	1.981	1.55	1.556
N634	Zhongmoudujiaohu	ND	Arachis.hypogaea.subsp.hypogaea.var.hypogaea	Henan, China	1.569	1.616	1.649
N635	Laiyangdalidun	zh.h0880	Arachis.hypogaea.subsp.hypogaea.var.hypogaea	Shandong, China	1.547	1.111	1.477
N636	Beijingzhilida	zh.h0681	Arachis.hypogaea.subsp.hypogaea.var.hypogaea	Beijing, China	1.295	1.382	1.405
N637	Changliyiwohou	zh.h0685	Arachis.hypogaea.subsp.hypogaea.var.hypogaea	Hebei, China	1.647	1.802	1.814
N638	M 107-74	PI 476636	Arachis.hypogaea.subsp.hypogaea.var.hypogaea	Nigeria	1.509	1.263	2.006
N639	CC334	PI 159786	Arachis.hypogaea.subsp.hypogaea.var.hypogaea	Senegal	1.438	1.573	1.485
N640	Jianggezhuangbanman	zh.h0888	Arachis.hypogaea.subsp.hypogaea.var.hypogaea	Shandong, China	1.513	1.381	1.394
N641	11	PI 323268	Arachis.hypogaea.subsp.hypogaea.var.hypogaea	India	1.252	1.547	1.186
N642	Xingshanzihuasheng	zh.h1265	Arachis.hypogaea.subsp.hypogaea.var.hypogaea	Hubei, China	2.13	1.578	NA
N643	Lankaodahuasheng	zh.h1094	Arachis.hypogaea.subsp.hypogaea.var.hypogaea	Henan, China	1.745	1.601	1.395
N644	CC233	PI 290536	Arachis.hypogaea.subsp.hypogaea.var.hirsuta	India	1.442	1.614	1.597
N645	Xuzhou402	ND	Arachis.hypogaea.subsp.hypogaea.var.hypogaea	Jiangsu, China	1.488	1.568	1.497
N646	CC540	PI 295250	Arachis.hypogaea.subsp.hypogaea.var.hypogaea	Israel	2.203	3.21	NA
N647	Linhua2	ND	Arachis.hypogaea.subsp.hypogaea.var.hypogaea	Shandong, China	1.538	1.563	1.511
N648	Gushibazihuasheng	ND	Arachis.hypogaea.subsp.hypogaea.var.hypogaea	Henan, China	1.81	1.436	1.409
N649	47-16	PI 196635	Arachis.hypogaea.subsp.hypogaea.var.hypogaea	Madagascar	1.522	1.544	1.952
N650	Linqingyiwofeng	zh.h0844	Arachis.hypogaea.subsp.hypogaea.var.hypogaea	Shandong, China	1.427	2.164	1.162
N651	Fushandali	zh.h 0879	Arachis.hypogaea.subsp.hypogaea.var.hypogaea	Shandong, China	2.16	1.603	1.978
N652	Suiningerwo	zh.h1636	Arachis.hypogaea.subsp.hypogaea.var.hypogaea	Jiangsu, China	1.299	1.243	1.163
N653	Xiongbeihun1	zh.h2223	Arachis.hypogaea.subsp.hypogaea.var.hypogaea	Sichuan, China	0.583	1.091	1.075
N654	Mao-Ming Hwa-Sung	PI 461434	Arachis.hypogaea.subsp.hypogaea.var.hypogaea	China	1.483	1.538	1.333
N656	Beijingdalidun	zh.h0680	Arachis.hypogaea.subsp.hypogaea.var.hypogaea	Beijing, China	1.928	1.67	2.494
N658	Dongmingbenhuasheng	zh.h1067	Arachis.hypogaea.subsp.hypogaea.var.hypogaea	Henan, China	1.429	1.118	NA
N660	Linxiantuoyang(3)	ND	Arachis.hypogaea.subsp.hypogaea.var.hypogaea	Henan, China	1.261	1.145	1.355
N661	CC296	PI 399581	Arachis.hypogaea.subsp.hypogaea.var.hypogaea	Nigeria	1.547	1.401	2.618
N662	Qianyebanli	w.h04170	Arachis.hypogaea.subsp.hypogaea.var.hypogaea	Japan	1.217	1.363	1.313
N663	Luyidapayang	zh.h2212	Arachis.hypogaea.subsp.hypogaea.var.hirsuta	Henan, China	1.616	1.601	1.711
N664	1496-1	PI 343398	Arachis.hypogaea.subsp.hypogaea.var.hypogaea	Israel	1.249	1.427	2.255
N665	Jintangshenwozi	zh.h1234	Arachis.hypogaea.subsp.hypogaea.var.hirsuta	Sichuan, China	1.781	0.874	3.647
N666	CC287	PI 355271	Arachis.hypogaea.subsp.hypogaea.var.hypogaea	Mexico	2.053	1.485	1.414
N667	American	PI 259851	Arachis.hypogaea.subsp.hypogaea.var.hypogaea	Malawi	1.15	1.669	1.259
N668	American	PI 162857	Arachis.hypogaea.subsp.hypogaea.var.hypogaea	Sudan	1.741	1.747	1.447
N669	Shuluhuasheng	zh.h0714	Arachis.hypogaea.subsp.hypogaea.var.hypogaea	Hebei, China	1.444	1.881	1.767
N670	NO 15599	PI 259658	Arachis.hypogaea.subsp.hypogaea.var.hypogaea	Cuba	2.557	2.61	2.333
N671	Gongjiazhuangbanman	zh.h0887	Arachis.hypogaea.subsp.hypogaea.var.hypogaea	Shandong, China	1.846	1.548	1.765
N672	Jushanlimandahuasheng	ND	Arachis.hypogaea.subsp.hypogaea.var.hypogaea	Shanxi, China	1.232	1.054	2.649
N673	Fushanruanpi	zh.h0951	Arachis.hypogaea.subsp.hypogaea.var.hypogaea	Shandong, China	1.765	1.84	1.474
N674	178	PI 296550	Arachis.hypogaea.subsp.hypogaea.var.hypogaea	Israel	1.113	1.281	2.111
N675	Zhongmou1-8	zh.h0559	Arachis.hypogaea.subsp.hypogaea.var.hirsuta	Henan, China	NA	NA	NA
N677	Renqiutieba	zh.h0729	Arachis.hypogaea.subsp.hypogaea.var.hypogaea	Hebei, China	NA	NA	NA
N680	Senegal 73-33	ND	Arachis.hypogaea.subsp.hypogaea.var.hypogaea	Senegal	1.585	1.401	1.416
N681	Jiyuanpotoutuoyang	ND	Arachis.hypogaea.subsp.hypogaea.var.hypogaea	Henan, China	1.982	1.309	2.474
N682	5009.7	PI 372271	Arachis.hypogaea.subsp.hypogaea.var.hypogaea	Nigeria	1.833	2.227	1.851
N684	CC728	PI 292950	Arachis.hypogaea.subsp.hypogaea.var.hypogaea	South Africa	1.675	2.599	2.128
N685	N C 25	PI 371521	Arachis.hypogaea.subsp.hypogaea.var.hypogaea	Israel	NA	NA	NA
N686	CC559	PI 158854	Arachis.hypogaea.subsp.hypogaea.var.hypogaea	Jiangxi, China	1	1.071	0.75
N687	YY-3	ND	Arachis.hypogaea.subsp.hypogaea.var.hypogaea	America	1.544	1.153	1.161
N688	Fuhua12	GPDhuasheng(2018)210203	Arachis.hypogaea.irregular-fastigiata-type	Liaoning, China	1.93	2.01	2.132
N689	Yuhua9327	GPDhuasheng(2018)410126	Arachis.hypogaea.irregular-hypogaea-type	Henan, China	1.89	1.216	1.888
N690	Baisha1016	Lunongshenzidi4	Arachis.hypogaea.irregular-fastigiata-type	Guangdong, China	0	0	0
N691	Yuanza9847	GPDhuasheng(2018)410129	Arachis.hypogaea.irregular-hypogaea-type	Henan, China	2.052	1.614	1.952
N692	Shitouqi	zh.h0235	Arachis.hypogaea.subsp.fastigiata.var.vulgaris	Guangdong, China	1.409	1.195	1.305
N693	Haihua1	zh.h1976	Arachis.hypogaea.irregular-hypogaea-type	Guangdong, China	1.649	1.849	1.85
N694	Yuanza9307	GPDhuasheng(2018)410128	Arachis.hypogaea.irregular-fastigiata-type	Henan, China	1.727	1.478	0.95
N695	Yuhua23	GPDhuasheng(2018)410068	Arachis.hypogaea.irregular-fastigiata-type	Henan, China	3.889	1.993	1.867
N696	Xuzhou68-4	(84)Jingshenyouzidi1	Arachis.hypogaea.irregular-hypogaea-type	Jiangsu, China	1.351	1.421	1.563
N697	Guihua17	Guishenzhengzidi117	Arachis.hypogaea.subsp.fastigiata.var.vulgaris	Guangxi, China	2.381	2.463	1.945
N698	Kainong53	Yushenhua2008001	Arachis.hypogaea.irregular-hypogaea-type	Henan, China	1.806	2.327	1.371
N699	Luhua9	GS07001—1990	Arachis.hypogaea.irregular-hypogaea-type	Shandong, China	1.685	2.275	1.992
N700	Tianfu18	GPDhuasheng(2019)510210	Arachis.hypogaea.irregular-hypogaea-type	Sichuan, China	1.797	1.537	1.714
N701	Luhua11	Luzhongshenzidi0133	Arachis.hypogaea.irregular-hypogaea-type	Shandong, China	1.724	1.601	1.368
N702	Shanhua7	GPDhuasheng(2019)370042	Arachis.hypogaea.irregular-hypogaea-type	Shandong, China	1.5	1.593	1.479
N703	Jihua6	GPDhuasheng(2017)130021	Arachis.hypogaea.irregular-hypogaea-type	Hebei, China	2.038	2.049	2.042
N704	Yuhua7	Guoshenyou20000007	Arachis.hypogaea.irregular-hypogaea-type	Henan, China	1.354	1.648	1.438
N705	Yuhua9326	GPDhuasheng(2018)410069	Arachis.hypogaea.irregular-hypogaea-type	Henan, China	1.433	1.984	1.98
N706	Zhonghua8	GPDhuasheng(2019)420249	Arachis.hypogaea.irregular-fastigiata-type	Hubei, China	2	2.133	1.958
N707	Tianfu3	zh.h0106	Arachis.hypogaea.irregular-hypogaea-type	Sichuan, China	1.17	1.403	1.544
N708	Zhonghua16	GPDhuasheng(2019)420251	Arachis.hypogaea.irregular-fastigiata-type	Hubei, China	0	0	0
N709	Zhonghua6	GPDhuasheng(2019)420218	Arachis.hypogaea.subsp.fastigiata.var.vulgaris	Hubei, China	1.655	1.684	1.756
N710	Kainong61	GPDhuasheng(2017)410026	Arachis.hypogaea.irregular-hypogaea-type	Henan, China	1.953	1.951	1.718
N711	Yueyou7	GPDhuasheng(2019)440082	Arachis.hypogaea.subsp.fastigiata.var.vulgaris	Guangdong, China	1.129	1.552	1.279
N712	Wanhua2	GPDhuasheng(2018)410111	Arachis.hypogaea.irregular-fastigiata-type	Henan, China	1.917	1.939	2.313
N713	Yuhua37	GPDhuasheng(2018)410020	Arachis.hypogaea.subsp.hypogaea.var.hypogaea	Henan, China	1.437	1.234	1.26
N714	Yuhua40	GPDhuasheng(2018)410021	Arachis.hypogaea.irregular-fastigiata-type	Henan, China	1.978	1.202	1.382
N715	Kainong49	GPDhuasheng(2019)410078	Arachis.hypogaea.irregular-hypogaea-type	Henan, China	2.188	1.854	1
N716	Zhuhua1	Yushenhua2007001	Arachis.hypogaea.irregular-fastigiata-type	Henan, China	0	0	0
N717	Huayu25	GPDhuasheng(2018)370406	Arachis.hypogaea.irregular-hypogaea-type	Shandong, China	1.301	2.25	1.5
N718	Fenghua3	GPDhuasheng(2018)370223	Arachis.hypogaea.irregular-hypogaea-type	Shandong, China	1.465	1.533	1.347
N719	Huayu19	GPDhuasheng(2018)370398	Arachis.hypogaea.irregular-hypogaea-type	Shandong, China	1.695	1.9	2.093
N720	Huayu22	GPDhuasheng(2018)370399	Arachis.hypogaea.irregular-hypogaea-type	Shandong, China	2.505	1.859	1.99
N721	Jihua4	GPDhuasheng(2017)130023	Arachis.hypogaea.irregular-hypogaea-type	Hebei, China	1.817	2.278	2.2
N722	Luhua14	Guoshenyou20000006	Arachis.hypogaea.subsp.hypogaea.var.hypogaea	Shandong, China	1.13	1.547	1.894
N723	Pukehua9	GPDhuasheng(2018)410001	Arachis.hypogaea.irregular-hypogaea-type	Henan, China	1.352	2.754	2.017
N724	Huayu16	Luzhongshenzidi0265	Arachis.hypogaea.irregular-hypogaea-type	Shandong, China	3.25	2.189	2.854
N725	Quanhua7	GPDhuasheng(2018)350079	Arachis.hypogaea.subsp.fastigiata.var.vulgaris	Fujian, China	0.857	1.408	2.346
N726	Shanyou27	GPDhuasheng(2018)440292	Arachis.hypogaea.subsp.fastigiata.var.vulgaris	Guangdong, China	1.437	1.672	0.845
N727	Shanyou71	GPDhuasheng(2018)440295	Arachis.hypogaea.subsp.fastigiata.var.vulgaris	Guangdong, China	1.476	1.639	0.801
N728	Zhongkaihua1	GPDhuasheng(2018)440416	Arachis.hypogaea.subsp.fastigiata.var.vulgaris	Guangdong, China	1.75	1.72	1.688
N729	wt08-0937	ND	Arachis.hypogaea.subsp.hypogaea.var.hypogaea	America	NA	NA	NA
N730	Yuanza9102	GPDhuasheng(2018)410109	Arachis.hypogaea.irregular-fastigiata-type	Henan, China	1.905	2.073	2.197
N731	SunOleic	ND	Arachis.hypogaea.subsp.hypogaea.var.hypogaea	America	1.44	1.523	1.614
N732	wt08-0932	ND	Arachis.hypogaea.subsp.fastigiata.var.vulgaris	America	1.844	2.955	1.827
N733	Nanyangcai	ND	Arachis.hypogaea.subsp.fastigiata.var.peruviana	Henan, China	1.882	1.832	1.981
N734	Yuhua15	GPDhuasheng(2018)410108	Arachis.hypogaea.irregular-hypogaea-type	Henan, China	3	2.256	2.071
N735	wt09-0023	ND	Arachis.hypogaea.subsp.hypogaea.var.hypogaea	America	1.465	1.629	1.48
N738	Tifrunner	PI 644011	Arachis.hypogaea.subsp.hypogaea.var.hypogaea	America	0	0	0
N739	NC94022	ND	Arachis.hypogaea.subsp.hypogaea.var.hypogaea	America	1.852	1.869	1.283
N741	Silihong	ND	Arachis.hypogaea.subsp.fastigiata.var.fastigiata	Liaoning, China	1.368	1.809	1.413
N742	55-437	PI 360862	Arachis.hypogaea.subsp.fastigiata.var.vulgaris	Senegal	1.287	0.932	0.801
N743	Weihua8	Lunongshenzi[2003]014	Arachis.hypogaea.irregular-hypogaea-type	Shandong, China	1.106	1.415	1.055
N744	Fuhuasheng	zh.h0082	Arachis.hypogaea.irregular-hypogaea-type	Shandong, China	1.25	1.333	1.263
N745	Yueyou20	Yueshenyou2004002	Arachis.hypogaea.subsp.fastigiata.var.vulgaris	Guangdong, China	1.46	1.431	1.614
N748	Puyangzhenzhudou	ND	Arachis.hypogaea.irregular-fastigiata-type	Henan, China	1.987	1.588	1.519
N750	Kainongbai2	Yushenhua2006004	Arachis.hypogaea.irregular-hypogaea-type	Henan, China	1.434	1.42	1.555
N751	Jitian1	ND	Arachis.hypogaea.irregular-fastigiata-type	Hebei, China	1.742	1.883	1.927
N752	Hanghua2	GPDhuasheng(2019)440087	Arachis.hypogaea.subsp.fastigiata.var.vulgaris	Guangdong, China	0.861	1.111	0.758
N753	Yueyou13	GPDhuasheng(2019)440079	Arachis.hypogaea.subsp.fastigiata.var.vulgaris	Guangdong, China	0	0	0
N754	PuyangTT1	ND	Arachis.hypogaea.irregular-hypogaea-type	Henan, China	1.171	1.562	1.55
N756	Yueyou18	GPDhuasheng(2019)440081	Arachis.hypogaea.subsp.fastigiata.var.vulgaris	Guangdong, China	1.654	1.314	0.876
N762	Yuhua27	GPDhuasheng(2018)410158	Arachis.hypogaea.irregular-hypogaea-type	Henan, China	2.375	1.989	1.754
N763	Yuhua31	GPDhuasheng(2018)410160	Arachis.hypogaea.irregular-hypogaea-type	Henan, China	1.817	1.823	1.985
N764	Yuhua9502	GPDhuasheng(2019)410077	Arachis.hypogaea.irregular-hypogaea-type	Henan, China	2.543	2.118	2.599
N765	Yuhua9620	GPDhuasheng(2018)410130	Arachis.hypogaea.irregular-hypogaea-type	Henan, China	2.018	1.909	2.607
N766	Yuhua9634	Guopinjian2008009	Arachis.hypogaea.irregular-hypogaea-type	Henan, China	1.324	1.809	1.756
N767	Yuhua99A25	ND	Arachis.hypogaea.irregular-hypogaea-type	Henan, China	1.418	2.738	2.036
N768	Yuhua9925	Yushenhua2010004	Arachis.hypogaea.irregular-hypogaea-type	Henan, China	1.673	2.328	1.863
N770	Junda11	ND	Arachis.hypogaea.irregular-hypogaea-type	Henan, China	2.073	2.137	1.919
N776	Kainong71	GPDhuasheng(2018)410117	Arachis.hypogaea.irregular-hypogaea-type	Henan, China	1.836	1.713	1.808
N779	Shanghua511	GPDhuasheng(2018)410113	Arachis.hypogaea.irregular-hypogaea-type	Henan, China	2.044	1.536	1.083
N782	TAMSPAN 90	PI 550721	Arachis.hypogaea.subsp.fastigiata.var.vulgaris	America	1.543	1.497	1.572
N789	Yuhua2	ND	Arachis.hypogaea.irregular-hypogaea-type	Henan, China	3.167	2.077	3.625
N790	Yuhua9	Guoshenyou20000005	Arachis.hypogaea.irregular-hypogaea-type	Henan, China	2.333	2.089	2.717
N815	YY-1	ND	Arachis.hypogaea.subsp.hypogaea.var.hypogaea	America	1.137	0.703	1.282
N816	YY-2	ND	Arachis.hypogaea.subsp.hypogaea.var.hypogaea	America	1.625	1.122	1.653
N818	Jitian2	ND	Arachis.hypogaea.irregular-hypogaea-type	Hebei, China	1.546	1.289	1.529
N822	Zhonghua4	GS07001-1994	Arachis.hypogaea.subsp.fastigiata.var.vulgaris	Hubei, China	NA	NA	NA
N826	Quanhua27	GPDhuasheng(2018)350347	Arachis.hypogaea.subsp.fastigiata.var.vulgaris	Fujian, China	1.745	1.747	1.625
N830	Kainong176	GPDhuasheng(2017)410039	Arachis.hypogaea.subsp.hypogaea.var.hypogaea	Henan, China	1.625	1.364	1.166
N834	Kainong1760	GPDhuasheng(2017)410008	Arachis.hypogaea.irregular-hypogaea-type	Henan, China	1.889	2.133	2.044
N836	Jihua18	GPDhuasheng(2017)130015	Arachis.hypogaea.subsp.hypogaea.var.hypogaea	Hebei, China	1.408	1.426	1.414
N838	Jihua16	GPDhuasheng(2017)130016	Arachis.hypogaea.subsp.hypogaea.var.hypogaea	Hebei, China	2.049	1.751	1.751
N840	Jihua13	GPDhuasheng(2017)130017	Arachis.hypogaea.subsp.hypogaea.var.hypogaea	Hebei, China	1.642	1.371	1.363
N842	Kainong1715	GPDhuasheng(2017)410033	Arachis.hypogaea.subsp.hypogaea.var.hypogaea	Henan, China	1.347	1.378	1.422
N843	Zhengnonghua9	Yushenhua2010003	Arachis.hypogaea.irregular-hypogaea-type	Henan, China	1.438	1.622	1.448
N847	Kaixuan01-6	ND	Arachis.hypogaea.subsp.hypogaea.var.hypogaea	America	1.933	2.1	2.013
N848	Luohua8	GPDhuasheng(2018)410016	Arachis.hypogaea.irregular-fastigiata-type	Henan, China	1.756	3.15	1.568
N849	Yuhua34	GPDhuasheng(2018)410163	Arachis.hypogaea.irregular-hypogaea-type	Henan, China	1.71	1.773	1.677
N850	Anhua0017	Yushenhua2014001	Arachis.hypogaea.irregular-hypogaea-type	Henan, China	2.666	1.855	2.304
N851	Yuhua47	GPDhuasheng(2018)410030	Arachis.hypogaea.irregular-hypogaea-type	Henan, China	2.039	2.076	1.825
N852	Yuanza9614	Yushenhua2006005	Arachis.hypogaea.irregular-fastigiata-type	Henan, China	1.362	1.216	1.171
N853	Shanghua5	GPDhuasheng(2018)410136	Arachis.hypogaea.irregular-fastigiata-type	Henan, China	2.29	2.109	1.871
N854	Fenghua1	GPDhuasheng(2018)370221	Arachis.hypogaea.irregular-hypogaea-type	Shandong, China	1.723	1.871	1.703
N855	Fenghua2	GPDhuasheng(2018)370222	Arachis.hypogaea.irregular-fastigiata-type	Shandong, China	1.325	1.267	1.36
N856	Fenghua4	GPDhuasheng(2018)370224	Arachis.hypogaea.irregular-fastigiata-type	Shandong, China	1.667	1.558	2.38
N857	Jinong99	ND	Arachis.hypogaea.irregular-hypogaea-type	Hebei, China	1.216	2.498	1.49
N858	Zheng8903	ND	Arachis.hypogaea.irregular-hypogaea-type	Henan, China	2.917	1.278	NA
N859	Zheng9001	ND	Arachis.hypogaea.irregular-hypogaea-type	Henan, China	1.75	3.04	NA
N861	wt08-0934	ND	Arachis.hypogaea.subsp.hypogaea.var.hypogaea	America	2.01	1.867	1.633
Note: NA indicate missing date; T7-CIR, T8-CIR, and T9-CIR represent the CIR data of peanut callus culture at the seventh, eighth, and ninth subcultures.
