# Supplementary material for: Genome-Wide Association Studies of Embryogenic Callus Induction Rate in Peanut (Arachis hypogaea L.)
Source: Genes (Basel). 2024 Jan 26;15(2):160. doi: 10.3390/genes15020160 (PMC10887910; doi:10.3390/genes15020160)
Supplement: Supplementary file 1 [file genes-15-00160-s001.zip › Table S2.xlsx]

## Sheet: Sheet1
Table S2. Phenotypic variation of callus induction rate for 353 peanut accessions at the T7, T8, and T9 subcultures
Subculture	Minimum	Maximum	Median	Mean±SD	CV(%)	Kurtosis	Skewness
T7	0	3.889	1.569	1.59±0.53	33.06	2.75708	-0.173803
T8	0	4.873	1.622	1.66±0.57	34.18	4.15021	0.362186
T9	0	3.786	1.561	1.58±0.56	35.54	2.77454	0.147909
