# Supplementary material for: Genome-Wide Association Studies of Embryogenic Callus Induction Rate in Peanut (Arachis hypogaea L.)
Source: Genes (Basel). 2024 Jan 26;15(2):160. doi: 10.3390/genes15020160 (PMC10887910; doi:10.3390/genes15020160)
Supplement: Supplementary file 1 [file genes-15-00160-s001.zip › Table S3.xlsx]

## Sheet: Sheet1
Table S3. 600 annotated genes associated with SNPs at the T7, T8, and T9 subcultures.
Subculture	SNP location (bp)	Chr	Candidate gene	Gene interval (bp)	Functional annotation
T7	44535215	Arahy.01	Arahy.GSE1P2	44,469,952-44,470,472	subtilisin-like serine protease 2
		Arahy.01	Arahy.2L619Y	44,477,833-44,482,133	NAC domain protein,
		Arahy.01	Arahy.KCTF4J	44,544,077-44,544,971	SAUR-like auxin-responsive protein family
		Arahy.01	Arahy.MG21LA	44,546,377-44,553,097	beta vacuolar processing enzyme
		Arahy.01	Arahy.FSA67V	44,573,080-44,576,695	NADH dehydrogenase (ubiquinone) complex I, assembly factor 6-like isoform X2
	37905924	Arahy.01	Arahy.6W2W8X	37,777,131-37,781,543	MYB transcription factor MYB93
		Arahy.01	Arahy.MWEA9C	37,798,103-37,805,868	acyl-CoA oxidase 1
	78055673	Arahy.02	Arahy.RNL7K1	77,885,194-77,891,411	Unknown protein
		Arahy.02	Arahy.1TW0Z8	77,911,297-77,921,964	ion channel pollux-like protein
		Arahy.02	Arahy.H0QU5C	77,932,829-77,936,217	Unknown protein
		Arahy.02	Arahy.7J7E83	78,015,452-78,023,173	acylamino-acid-releasing enzyme-like protein, putative
		Arahy.02	Arahy.PSR5PH	78,088,070-78,088,645	zinc finger MYM-type protein 1-like
		Arahy.02	Arahy.EE1039	78,156,649-78,160,954	peroxisomal 3-ketoacyl-CoA thiolase 3
		Arahy.02	Arahy.ASV3U0	78,179,300-78,182,372	DNA replication complex GINS SLD5-like protein
		Arahy.02	Arahy.3ITB8I	78,201,753-78,209,992	Protein kinase superfamily protein
	110745152	Arahy.12	Arahy.2DV4RV	110,550,059-110,554,903	Peroxidase superfamily protein
		Arahy.12	Arahy.M1BGRG	110,563,382-110,565,881	Unknown protein
		Arahy.12	Arahy.H4F98K	110,575,541-110,577,646	probable pectinesterase/pectinesterase inhibitor 17-like
		Arahy.12	Arahy.Y2VAH7	110,603,111-110,605,215	probable pectinesterase/pectinesterase inhibitor 17-like
		Arahy.12	Arahy.4JBV7I	110,646,391-110,648,487	probable pectinesterase/pectinesterase inhibitor 17-like
		Arahy.12	Arahy.HHEE1N	110,683,592-110,685,888	probable pectinesterase/pectinesterase inhibitor 17-like
		Arahy.12	Arahy.8PHP50	110,692,008-110,698,237	probable pectinesterase/pectinesterase inhibitor 36-like
		Arahy.12	Arahy.931R8V	110,717,287-110,722,813	methionine aminopeptidase 1A
		Arahy.12	Arahy.45AVND	110,725,721-110,726,401	Plant invertase/pectin methylesterase inhibitor superfamily protein
		Arahy.12	Arahy.ZUCN90	110,730,403-110,733,921	uncharacterized protein LOC100499972 isoform X6
		Arahy.12	Arahy.WET4Y7	110,749,327-110,752,666	S-adenosylmethionine-dependent methyltransferase, putative
		Arahy.12	Arahy.02D1WC	110,753,357-110,756,335	ycf20-like protein-like
		Arahy.12	Arahy.PBYD8I	110,756,370-110,760,221	nitroreductase family protein
		Arahy.12	Arahy.H4TS3C	110,767,487-110,767,723	squamosa promoter-binding-like protein 9-like isoform X2
		Arahy.12	Arahy.2VF8XD	110,773,471-110,777,248	arginase
		Arahy.12	Arahy.QA02YE	110,777,934-110,778,422	peptide transporter 1
		Arahy.12	Arahy.V33WN8	110,780,312-110,780,680	arginase
		Arahy.12	Arahy.C1SY8Y	110,781,674-110,781,917	peptide transporter 1
		Arahy.12	Arahy.M89JWR	110,782,249-110,794,939	Pentatricopeptide repeat (PPR) superfamily protein
		Arahy.12	Arahy.G9BQRV	110,795,074-110,797,997	hemK methyltransferase family member 2-like isoform X4
		Arahy.12	Arahy.W4ZQ00	110,798,907-110,800,895	receptor-like kinase
		Arahy.12	Arahy.L9IHQN	110,802,865-110,803,883	receptor-like protein kinase 1
		Arahy.12	Arahy.ZUT89Z	110,805,960-110,808,608	receptor-like protein kinase 2
		Arahy.12	Arahy.46GJXK	110,812,150-110,816,210	Pentatricopeptide repeat (PPR) superfamily protein
		Arahy.12	Arahy.W6E3LK	110,871,041-110,874,450	magnesium transporter NIPA2-like isoform X2
		Arahy.12	Arahy.H66GYP	110,874,504-110,877,291	magnesium transporter NIPA2-like isoform X2
		Arahy.12	Arahy.42HLBV	110,882,959-110,884,831	Unknown protein
		Arahy.12	Arahy.CQJ8WU	110,909,504-110,912,061	F-box protein interaction domain protein
		Arahy.12	Arahy.H3PAM0	110,915,522-110,917,910	receptor-like protein kinase 2
		Arahy.12	Arahy.A52I0E	110,923,274-110,927,583	Transketolase
		Arahy.12	Arahy.9A4JNA	110,928,417-110,932,954	3-phosphoshikimate 1-carboxyvinyltransferase
		Arahy.12	Arahy.W7KXM9	110,943,677-110,950,310	UDP-D-glucuronate 4-epimerase 3
	110744821	Arahy.12	Arahy.2DV4RV	110,550,059-110,554,903	Peroxidase superfamily protein
		Arahy.12	Arahy.M1BGRG	110,563,382-110,565,881	Unknown protein
		Arahy.12	Arahy.H4F98K	110,575,541-110,577,646	probable pectinesterase/pectinesterase inhibitor 17-like
		Arahy.12	Arahy.Y2VAH7	110,603,111-110,605,215	probable pectinesterase/pectinesterase inhibitor 17-like
		Arahy.12	Arahy.4JBV7I	110,646,391-110,648,487	probable pectinesterase/pectinesterase inhibitor 17-like
		Arahy.12	Arahy.HHEE1N	110,683,592-110,685,888	probable pectinesterase/pectinesterase inhibitor 17-like
		Arahy.12	Arahy.8PHP50	110,692,008-110,698,237	probable pectinesterase/pectinesterase inhibitor 36-like
		Arahy.12	Arahy.931R8V	110,717,287-110,722,813	methionine aminopeptidase 1A
		Arahy.12	Arahy.45AVND	110,725,721-110,726,401	Plant invertase/pectin methylesterase inhibitor superfamily protein
		Arahy.12	Arahy.ZUCN90	110,730,403-110,733,921	uncharacterized protein LOC100499972 isoform X6
		Arahy.12	Arahy.WET4Y7	110,749,327-110,752,666	S-adenosylmethionine-dependent methyltransferase, putative
		Arahy.12	Arahy.02D1WC	110,753,357-110,756,335	ycf20-like protein-like
		Arahy.12	Arahy.PBYD8I	110,756,370-110,760,221	nitroreductase family protein
		Arahy.12	Arahy.H4TS3C	110,767,487-110,767,723	squamosa promoter-binding-like protein 9-like isoform X2
		Arahy.12	Arahy.2VF8XD	110,773,471-110,777,248	arginase
		Arahy.12	Arahy.QA02YE	110,777,934-110,778,422	peptide transporter 1
		Arahy.12	Arahy.V33WN8	110,780,312-110,780,680	arginase
		Arahy.12	Arahy.C1SY8Y	110,781,674-110,781,917	peptide transporter 1
		Arahy.12	Arahy.M89JWR	110,782,249-110,794,939	Pentatricopeptide repeat (PPR) superfamily protein
		Arahy.12	Arahy.G9BQRV	110,795,074-110,797,997	hemK methyltransferase family member 2-like isoform X4
		Arahy.12	Arahy.W4ZQ00	110,798,907-110,800,895	receptor-like kinase
		Arahy.12	Arahy.L9IHQN	110,802,865-110,803,883	receptor-like protein kinase 1
		Arahy.12	Arahy.ZUT89Z	110,805,960-110,808,608	receptor-like protein kinase 2
		Arahy.12	Arahy.46GJXK	110,812,150-110,816,210	Pentatricopeptide repeat (PPR) superfamily protein
		Arahy.12	Arahy.W6E3LK	110,871,041-110,874,450	magnesium transporter NIPA2-like isoform X2
		Arahy.12	Arahy.H66GYP	110,874,504-110,877,291	magnesium transporter NIPA2-like isoform X2
		Arahy.12	Arahy.42HLBV	110,882,959-110,884,831	Unknown protein
		Arahy.12	Arahy.CQJ8WU	110,909,504-110,912,061	F-box protein interaction domain protein
		Arahy.12	Arahy.H3PAM0	110,915,522-110,917,910	receptor-like protein kinase 2
		Arahy.12	Arahy.A52I0E	110,923,274-110,927,583	Transketolase
		Arahy.12	Arahy.9A4JNA	110,928,417-110,932,954	3-phosphoshikimate 1-carboxyvinyltransferase
	83801701	Arahy.13	Arahy.LC8K5G	83,747,374-83,747,929	peroxisomal ABC transporter 1
		Arahy.13	Arahy.8TQ98L	83,752,562-83,755,339	glycerol-3-phosphate transporter
	143122895	Arahy.13	Arahy.982ILH	142,945,811-142,947,642	photosystem II CP43 chlorophyll apoprotein
		Arahy.13	Arahy.4LZ7P3	142,947,668-142,948,530	Photosystem II D2 protein n=17 Tax=Eukaryota RepID=G7JG11_MEDTR
		Arahy.13	Arahy.35X7CR	142,954,736-142,956,711	Cytochrome P450 superfamily protein
		Arahy.13	Arahy.HXVX6H	142,980,055-142,980,866	Unknown protein
		Arahy.13	Arahy.0AN8KE	142,988,563-142,990,674	Cytochrome P450 superfamily protein
		Arahy.13	Arahy.ZTC9IW	142,997,274-143,001,005	uncharacterized protein LOC102661964
		Arahy.13	Arahy.3X9X11	143,007,913-143,008,714	uncharacterized protein LOC100807379 isoform X3
		Arahy.13	Arahy.U3RWIM	143,009,003-143,012,077	FKBP-like peptidyl-prolyl cis-trans isomerase family protein
		Arahy.13	Arahy.RQ5X65	143,018,950-143,023,098	ATP binding/protein serine/threonine kinase
		Arahy.13	Arahy.3VSL80	143,023,791-143,025,358	complex I subunit
		Arahy.13	Arahy.M3VXN8	143,027,351-143,031,334	uncharacterized protein LOC100803851 isoform X1
		Arahy.13	Arahy.F3M97M	143,040,013-143,052,731	uncharacterized protein LOC100802419 isoform X4
		Arahy.13	Arahy.P8J958	143,058,652-143,059,677	Tetratricopeptide repeat (TPR)-like superfamily protein
		Arahy.13	Arahy.9ZRQ90	143,065,568-143,068,905	interferon-related developmental regulator family protein / IFRD protein family
		Arahy.13	Arahy.LT9XWZ	143,086,946-143,090,488	V-type proton ATPase subunit F-like
		Arahy.13	Arahy.NCR277	143,094,255-143,098,477	probable CDP-diacylglycerol--inositol 3-phosphatidyltransferase 2
		Arahy.13	Arahy.U7H2Z0	143,101,922-143,105,590	uncharacterized protein At2g02148-like isoform X2
		Arahy.13	Arahy.UN0AT6	143,106,285-143,110,504	Pentatricopeptide repeat (PPR-like) superfamily protein
		Arahy.13	Arahy.PUF5Z4	143,113,990-143,117,501	remorin-like
		Arahy.13	Arahy.QW19KK	143,136,306-143,139,975	zinc finger CCCH domain-containing protein 17-like
		Arahy.13	Arahy.HRA99Y	143,139,931-143,145,984	tobamovirus multiplication protein 3
		Arahy.13	Arahy.T52I9D	143,159,573-143,164,133	sequence-specific DNA binding transcription factors
		Arahy.13	Arahy.6X8F5T	143,176,213-143,180,586	peptide transporter 2
		Arahy.13	Arahy.9R1SIR	143,182,434-143,187,705	peptide transporter 2
		Arahy.13	Arahy.EIBT4Y	143,188,322-143,191,135	peptide transporter 2
		Arahy.13	Arahy.Y0PXUN	143,193,691-143,196,211	eukaryotic translation initiation factor 3 subunit I
		Arahy.13	Arahy.0TY6P3	143,196,208-143,196,982	Unknown protein
		Arahy.13	Arahy.P1HIL5	143,197,151-143,198,383	histone-lysine N-methyltransferase ASHR2-like isoform X3
		Arahy.13	Arahy.UEDC6Z	143,198,462-143,199,921	Unknown protein
		Arahy.13	Arahy.YNYX6A	143,201,976-143,204,037	protein XRI1-like isoform X4
		Arahy.13	Arahy.P8F85A	143,249,764-143,260,684	sodium hydrogen exchanger 5
		Arahy.13	Arahy.VX1QFG	143,261,208-143,265,181	transmembrane 9 superfamily member 3-like
		Arahy.13	Arahy.MG2JR8	143,285,570-143,288,258	zinc finger protein MAGPIE-like
		Arahy.13	Arahy.Z451UL	143,295,755-143,297,530	lipase class 3 family protein
		Arahy.13	Arahy.BQ8TCS	143,306,967-143,308,618	GAGA-binding protein isoform X3
		Arahy.13	Arahy.MBA9QB	143,310,866-143,311,969	clathrin coat assembly protein AP180-like
		Arahy.13	Arahy.QAPF3L	143,312,693-143,323,226	ZIP metal ion transporter family
		Arahy.13	Arahy.FUMC5T	143,313,822-143,314,830	uncharacterized protein LOC100785535
	91882550	Arahy.13	Arahy.H7HAX3	91,732,381-91,739,552	CBS domain-containing protein with a domain of unknown function (DUF21)
		Arahy.13	Arahy.TNRR0X	91,744,025-91,751,890	debranching enzyme 1
		Arahy.13	Arahy.I9ZU4J	91,906,513-91,907,331	hypothetical protein
		Arahy.13	Arahy.NH2PDE	91,908,314-91,913,820	Translocon-associated family protein n=1 Tax=Populus trichocarpa RepID=A9PFV9_POPTR
		Arahy.13	Arahy.WJ50EA	91,916,703-91,917,958	Unknown protein
		Arahy.13	Arahy.9Q6XN1	91,921,311-91,926,610	ethanolamine-phosphate cytidylyltransferase
		Arahy.13	Arahy.FV9V0P	91,921,422-91,922,864	unknown protein
		Arahy.13	Arahy.U8P99Q	91,934,914-91,938,008	cysteine synthase C1
		Arahy.13	Arahy.LULC1Z	91,950,271-91,954,186	ATP-binding ABC transporter
		Arahy.13	Arahy.CH5A50	91,954,110-91,961,683	Homeodomain-like transcriptional regulator
		Arahy.13	Arahy.PC8EL3	92,078,974-92,083,335	ATP binding / kinase/ protein kinase/ protein serine/threonine kinase/ protein-tyrosine kinase n=4 Tax=rosids RepID=C5DB54_VITVI
	87089142	Arahy.13	Arahy.B51AEH	86,915,812-86,918,437	uncharacterized protein LOC102661803
		Arahy.13	Arahy.U2WZ8A	86,950,534-86,953,632	uncharacterized protein LOC102665201 isoform X3
		Arahy.13	Arahy.PK5V4W	86,987,893-86,999,830	Ribosome-binding ATPase YchF n=5 Tax=Bacillus RepID=F7Z747_BACC6
	17372387	Arahy.13	Arahy.Z0Z3SY	17,173,316-17,179,535	enhancer of polycomb homolog 2-like isoform X2
		Arahy.13	Arahy.I1CX7V	17,245,402-17,248,068	Pentatricopeptide repeat (PPR) superfamily protein
		Arahy.13	Arahy.AS37GI	17,249,252-17,251,016	Unknown protein
		Arahy.13	Arahy.FH5WCV	17,251,094-17,252,248	sulfite oxidase
		Arahy.13	Arahy.2NE4Q7	17,251,821-17,253,819	SAUR-like auxin-responsive protein family
		Arahy.13	Arahy.YSF7LC	17,304,421-17,306,770	DNA mismatch repair MUTS family protein
		Arahy.13	Arahy.KYEU97	17,315,167-17,318,200	C4-dicarboxylate transporter/malic acid transport protein
		Arahy.13	Arahy.S3VQUL	17,355,163-17,357,615	B-cell receptor-associated 31-like
		Arahy.13	Arahy.7P97F6	17,361,976-17,370,312	chromodomain-helicase-DNA-binding protein 1-like isoform X2
		Arahy.13	Arahy.LJ25B0	17,411,298-17,412,529	glycine-rich cell wall structural protein 1-like
		Arahy.13	Arahy.SJMT99	17,480,352-17,481,722	Membrane-associated zinc metalloprotease family protein, expressed n=3 Tax=Oryza RepID=Q84NY6_ORYSJ
		Arahy.13	Arahy.4B15T0	17,498,819-17,502,146	myb transcription factor
	7863511	Arahy.13	Arahy.VIQ68K	7,673,644-7,678,083	Sec14p-like phosphatidylinositol transfer family protein
		Arahy.13	Arahy.CN4LCL	7,678,149-7,683,740	Sec14p-like phosphatidylinositol transfer family protein
		Arahy.13	Arahy.XJ3ZRF	7,719,221-7,719,715	TGACG-sequence-specific DNA-binding protein TGA-1B-like
		Arahy.13	Arahy.EY9GJL	7,744,276-7,745,558	V-type proton ATPase subunit E2-like isoform X1
		Arahy.13	Arahy.0BY36D	7,748,354-7,752,507	probable nucleolar protein 5-2-like
		Arahy.13	Arahy.97EMNK	7,763,554-7,768,352	ATP binding/protein serine/threonine kinase
		Arahy.13	Arahy.HJ7TPY	7,791,403-7,794,248	transmembrane protein, putative
		Arahy.13	Arahy.30UV9I	7,806,820-7,810,849	Essential protein Yae1, N-terminal
		Arahy.13	Arahy.CFN2UR	7,811,389-7,813,566	Papain family cysteine protease
		Arahy.13	Arahy.VQ916U	7,813,567-7,822,455	vacuolar proton ATPase A3
		Arahy.13	Arahy.V37JW4	7,823,338-7,829,222	DNA replication licensing factor MCM4
		Arahy.13	Arahy.Y15ID5	7,832,893-7,834,661	protein SHI RELATED SEQUENCE 1-like
		Arahy.13	Arahy.TWZZ0X	7,843,379-7,845,091	unknown protein
		Arahy.13	Arahy.YBLQ63	7,847,459-7,858,027	coatomer subunit alpha-2-like
		Arahy.13	Arahy.HNM84L	7,869,339-7,872,214	zinc finger protein CONSTANS-LIKE 5-like
		Arahy.13	Arahy.DN52HN	7,872,555-7,882,902	ATP-binding microtubule motor family protein
		Arahy.13	Arahy.EU2PQ7	7,896,575-7,901,649	xylulose kinase-1
		Arahy.13	Arahy.TQYE05	7,903,143-7,905,324	F-box/LRR protein
		Arahy.13	Arahy.3W6VHH	7,916,834-7,919,080	MEI2-like protein 1
		Arahy.13	Arahy.I36BMJ	7,920,525-7,922,893	RNA-binding CRS1 / YhbY (CRM) domain protein
		Arahy.13	Arahy.1DJ7XZ	7,922,896-7,927,922	MATE efflux family protein
		Arahy.13	Arahy.F7J56T	7,942,037-7,949,118	squalene synthase 1
		Arahy.13	Arahy.L2WNVF	7,950,313-7,954,052	SH3 domain-containing protein
		Arahy.13	Arahy.LJYJ4M	7,984,769-7,987,892	GATA transcription factor 5
		Arahy.13	Arahy.WMM9KJ	8,008,928-8,012,352	Cytochrome P450 superfamily protein
		Arahy.13	Arahy.3WL649	8,012,956-8,016,331	unknown protein
		Arahy.13	Arahy.XL3619	8,023,150-8,027,574	endoglucanase 24-like
		Arahy.13	Arahy.LML9QV	8,028,493-8,031,344	fructose-bisphosphate aldolase 2
		Arahy.13	Arahy.K5ZE2Z	8,032,963-8,033,834	fructose-bisphosphate aldolase 1
		Arahy.13	Arahy.W5PE0L	8,034,394-8,039,039	fructose-bisphosphate aldolase 2
		Arahy.13	Arahy.R1XHAZ	8,037,706-8,040,125	zinc finger protein CONSTANS-LIKE 2-like
	39653468	Arahy.14	Arahy.C6ZGU5	39,615,972-39,625,779	NADP-malic enzyme 2
		Arahy.14	Arahy.SI4FKG	39,802,122-39,804,507	auxin response factor 19
		Arahy.14	Arahy.B34LYU	39,805,067-39,806,507	deoxynucleoside triphosphate triphosphohydrolase SAMHD1 homolog isoform X3
	18525892	Arahy.14	Arahy.RXY1R8	18,344,962-18,346,338	Unknown protein
		Arahy.14	Arahy.I6XRGW	18,347,513-18,349,501	DNAJ-like 20
		Arahy.14	Arahy.4JB89L	18,351,748-18,358,337	condensin-2 complex subunit D3
		Arahy.14	Arahy.W3EIHW	18,376,456-18,384,004	ATP binding microtubule motor family protein isoform 1 n=2 Tax=Theobroma cacao RepID=UPI00042B34D8
		Arahy.14	Arahy.HDV1A7	18,407,047-18,409,728	auxin canalisation protein
		Arahy.14	Arahy.69YTHK	18,415,311-18,418,640	origin recognition complex protein 5
		Arahy.14	Arahy.6S0TFF	18,423,998-18,429,208	UB-like protease 1A
		Arahy.14	Arahy.7HPJ5W	18,447,210-18,455,039	ATP-binding ABC transporter
		Arahy.14	Arahy.PZAP36	18,467,787-18,473,931	BTB/POZ domain protein
		Arahy.14	Arahy.LR2V9P	18,541,758-18,548,433	protein arginine methyltransferase 4A
		Arahy.14	Arahy.6YY5F1	18,618,421-18,623,655	ankyrin repeat-containing protein At5g02620-like isoform X6
		Arahy.14	Arahy.16NKJZ	18,630,377-18,631,943	putative nuclease HARBI1-like
	16587777	Arahy.14	Arahy.ZLG2GC	16,388,580-16,394,438	melanoma-associated antigen 10-like isoform X3
		Arahy.14	Arahy.NABT72	16,388,763-16,390,661	disease-resistance response protein
		Arahy.14	Arahy.6SF5PD	16,431,385-16,432,989	disease-resistance response protein
		Arahy.14	Arahy.K0RSTP	16,443,285-16,444,209	uncharacterized protein LOC102666366
		Arahy.14	Arahy.NI91NG	16,444,271-16,445,354	uncharacterized protein LOC102663078
		Arahy.14	Arahy.G1WUXH	16,445,376-16,445,754	uncharacterized protein LOC102661783
		Arahy.14	Arahy.U9V6M4	16,454,836-16,456,441	disease-resistance response protein
		Arahy.14	Arahy.CJLK9M	16,495,002-16,499,611	Myb/SANT-like DNA-binding domain protein
		Arahy.14	Arahy.8F5MWG	16,512,100-16,513,478	uncharacterized protein LOC102661152 isoform X2
		Arahy.14	Arahy.QJW53T	16,527,518-16,529,221	probable polygalacturonase-like
		Arahy.14	Arahy.7I8QVG	16,559,653-16,584,985	probable polygalacturonase-like
		Arahy.14	Arahy.RE2MDR	16,562,995-16,564,354	heavy-metal-associated domain protein
		Arahy.14	Arahy.27IQR1	16,589,241-16,593,863	uncharacterized protein LOC100785473 isoform X1
		Arahy.14	Arahy.IZH9YM	16,688,570-16,690,877	ribosomal protein L11 methyltransferase-related
		Arahy.14	Arahy.5L16AK	16,726,516-16,731,474	alpha/beta-Hydrolases superfamily protein
		Arahy.14	Arahy.QEFP0G	16,732,785-16,741,550	DNA-directed RNA polymerase V subunit 1-like
		Arahy.14	Arahy.Y3H9JV	16,771,673-16,772,412	two pore calcium channel protein, putative
	29924017	Arahy.14	Arahy.V177AF	29,737,172-29,754,018	nuclear ribonuclease Z
		Arahy.14	Arahy.8LX4B2	29,761,834-29,766,985	U3 small nucleolar IMP4-like ribonucleoprotein
		Arahy.14	Arahy.NNV5AG	29,767,677-29,770,982	unknown protein
		Arahy.14	Arahy.71GTDD	29,815,939-29,819,395	uncharacterized protein LOC100808048 isoform X2
		Arahy.14	Arahy.90Y58A	29,820,269-29,821,052	Unknown protein
		Arahy.14	Arahy.E901NL	29,977,548-29,980,794	mRNA-decapping enzyme-like protein
	37587465	Arahy.14	Arahy.L1LZAQ	37,523,703-37,526,790	uncharacterized protein LOC100777981 isoform X3
		Arahy.14	Arahy.K1E5VJ	37,580,692-37,583,170	glucan endo-1,3-beta-glucosidase 11-like
		Arahy.14	Arahy.W0CMT4	37,587,904-37,588,571	Tetratricopeptide repeat (TPR)-like superfamily protein
		Arahy.14	Arahy.B55RN5	37,639,133-37,641,257	Calcium-dependent lipid-binding (CaLB domain) family protein
		Arahy.14	Arahy.RI7QVZ	37,641,818-37,645,263	Phosphoglucomutase/phosphomannomutase, alpha/beta/alpha domain II n=2 Tax=Clostridium RepID=A7VV21_9CLOT
	33807861	Arahy.14	Arahy.8VMZ7D	33,816,380-33,820,473	ZIP zinc/iron transport family protein
		Arahy.14	Arahy.234RNS	33,925,226-33,929,640	ZIP zinc/iron transport family protein
	19876608	Arahy.14	Arahy.U2G3U9	19,767,715-19,771,725	unknown protein
		Arahy.14	Arahy.SK9510	19,844,804-19,845,980	Unknown protein
		Arahy.14	Arahy.T3MISZ	19,972,506-19,973,002	transmembrane protein
		Arahy.14	Arahy.1ES6B1	19,974,434-19,976,584	uncharacterized protein LOC100797825
		Arahy.14	Arahy.C5NHEB	19,987,141-19,997,057	ubiquitin-protein ligase, cullin 4
		Arahy.14	Arahy.62I324	20,030,247-20,034,011	probable 2-oxoglutarate/Fe(II)-dependent dioxygenase-like
	31198728	Arahy.14	Arahy.41N8FB	31,064,082-31,068,242	purin-rich alpha 1
		Arahy.14	Arahy.C8A64A	31,156,053-31,160,456	Unknown protein
		Arahy.14	Arahy.4QG36H	31,160,813-31,162,487	Unknown protein
		Arahy.14	Arahy.8317D2	31,163,637-31,165,756	protein FAR1-RELATED SEQUENCE 3-like isoform X1
		Arahy.14	Arahy.WYYM4H	31,169,489-31,175,127	hypothetical protein
		Arahy.14	Arahy.GHD6QC	31,179,396-31,184,732	unknown protein
		Arahy.14	Arahy.EJ0ZDQ	31,184,715-31,187,716	Pyruvate kinase family protein
		Arahy.14	Arahy.GBZS02	31,218,044-31,227,406	glucosidase II beta subunit-like protein
		Arahy.14	Arahy.FD4N4I	31,229,054-31,230,032	Unknown protein
		Arahy.14	Arahy.98YV0Z	31,317,088-31,317,404	putative nuclease HARBI1-like
		Arahy.14	Arahy.JQ9TK2	31,317,602-31,317,892	putative nuclease HARBI1-like
	124709181	Arahy.17	Arahy.7J26PX	124,517,162-124,519,611	Acyl-[acyl-carrier-protein] desaturase n=2 Tax=Solanum RepID=K4C635_SOLLC
		Arahy.17	Arahy.66WYUB	124,529,206-124,533,764	alcohol dehydrogenase 1
		Arahy.17	Arahy.XKFQ8F	124,555,034-124,570,348	Pentatricopeptide repeat (PPR-like) superfamily protein
		Arahy.17	Arahy.61R3GI	124,565,748-124,569,223	thylakoid lumenal 29.8 kDa protein
		Arahy.17	Arahy.92XS5N	124,573,304-124,574,039	CTV.20 n=1 Tax=Poncirus trifoliata RepID=Q8H6Q8_PONTR
		Arahy.17	Arahy.ZJK84D	124,574,147-124,574,482	nucleolin 1-like
		Arahy.17	Arahy.IA7WGU	124,600,869-124,606,911	viral movement protein
		Arahy.17	Arahy.3965TZ	124,639,743-124,642,102	Sugar transporter SWEET n=3 Tax=Solanum RepID=M1CBD6_SOLTU
		Arahy.17	Arahy.7FYT6C	124,646,216-124,647,778	Coiled-coil domain-containing protein 18, putative isoform 1 n=1 Tax=Theobroma cacao RepID=UPI00042B89CF
		Arahy.17	Arahy.2FQ9M1	124,756,606-124,768,217	transcriptional corepressor SEUSS-like isoform X2
		Arahy.17	Arahy.4B04P3	124,765,045-124,766,956	Thioredoxin superfamily protein
		Arahy.17	Arahy.N95E0M	124,776,193-124,779,364	scarecrow-like protein 1-like
		Arahy.17	Arahy.26LA0S	124,822,009-124,824,185	myb transcription factor
		Arahy.17	Arahy.SHB49X	124,858,265-124,858,998	blue copper protein-like
		Arahy.17	Arahy.Q1XR2M	124,864,059-124,865,491	Peptidase family M48 family protein
		Arahy.17	Arahy.N9VQ32	124,865,117-124,870,706	Pentatricopeptide repeat (PPR-like) superfamily protein
		Arahy.17	Arahy.Z51W7G	124,879,592-124,882,521	Pentatricopeptide repeat (PPR-like) superfamily protein
		Arahy.17	Arahy.A8R8TX	124,890,375-124,892,445	Pentatricopeptide repeat (PPR-like) superfamily protein
		Arahy.17	Arahy.H6TD7S	124,892,449-124,894,438	Pentatricopeptide repeat (PPR-like) superfamily protein
		Arahy.17	Arahy.AZH7DD	124,904,205-124,907,885	Unknown protein
	19417946	Arahy.20	Arahy.IG3GCS	19,248,786-19,251,068	BEACH domain-containing protein lvsC-like isoform X4
		Arahy.20	Arahy.ZI5CY8	19,254,715-19,260,128	thioredoxin O1
		Arahy.20	Arahy.NPWH83	19,289,135-19,306,180	conserved oligomeric Golgi complex component-related / COG complex component-related
		Arahy.20	Arahy.14SSX1	19,309,897-19,314,737	Conserved oligomeric Golgi complex subunit n=2 Tax=Papilionoideae RepID=G7LA94_MEDTR
		Arahy.20	Arahy.Z1X8E4	19,313,914-19,320,318	S-adenosyl-L-methionine-dependent methyltransferases superfamily protein
		Arahy.20	Arahy.26WXUQ	19,437,144-19,440,127	zinc finger MYM-type protein 1-like
		Arahy.20	Arahy.7P1RA8	19,464,156-19,469,207	ubiquitin carboxyl-terminal hydrolase
		Arahy.20	Arahy.J7WYQP	19,543,890-19,546,265	Unknown protein
		Arahy.20	Arahy.174QRA	19,558,743-19,560,162	histone-lysine N-methyltransferase, H3 lysine-9 specific SUVH1-like isoform X3
		Arahy.20	Arahy.TFS39J	19,560,188-19,565,493	histone-lysine N-methyltransferase SUVR2-like isoform X2
T8	15782356	Arahy.01	Arahy.A1BB80	15,649,609-15,650,842	Unknown protein
		Arahy.01	Arahy.095TGF	15,824,967-15,831,571	ethylene-responsive transcription factor 3
	85103096	Arahy.02	Arahy.7Y4A16	84,913,945-84,914,620	Unknown protein
		Arahy.02	Arahy.K9W603	84,919,337-84,925,051	DEAD-box ATP-dependent RNA helicase-like protein
		Arahy.02	Arahy.KTQ5NK	84,964,049-84,971,991	peptide transporter 1
		Arahy.02	Arahy.LFD3WS	85,009,557-85,011,863	receptor-like kinase 1
		Arahy.02	Arahy.TG5IZ1	85,135,354-85,142,755	peptide transporter 1
		Arahy.02	Arahy.UGPP85	85,276,063-85,276,641	uncharacterized protein LOC102664178
	8623742	Arahy.04	Arahy.FDV79C	8,447,496-8,453,333	ATP binding/protein serine/threonine kinase
		Arahy.04	Arahy.24DU69	8,464,712-8,467,078	L-tyrosine decarboxylase
		Arahy.04	Arahy.PC3CUU	8,466,334-8,466,657	L-tyrosine decarboxylase
		Arahy.04	Arahy.GTU453	8,482,976-8,483,617	plant invertase/pectin methylesterase inhibitor
		Arahy.04	Arahy.DP0IAK	8,528,683-8,534,102	nicotinate phosphoribosyltransferase-like
		Arahy.04	Arahy.MX0IDP	8,544,964-8,545,626	plant invertase/pectin methylesterase inhibitor
		Arahy.04	Arahy.I7DA1M	8,568,343-8,570,524	patatin-like protein 6
		Arahy.04	Arahy.NSD4SF	8,582,108-8,585,961	glycolipid transfer protein 1
		Arahy.04	Arahy.9EB9RH	8,598,054-8,605,707	cleavage and polyadenylation specificity factor CPSF30-like isoform X1
		Arahy.04	Arahy.SKGW0C	8,614,760-8,621,376	peroxidase 2
		Arahy.04	Arahy.J463ND	8,644,633-8,644,857	RNA-directed DNA polymerase n=1 Tax=Arachis hypogaea RepID=G0Y6U9_Arahy
		Arahy.04	Arahy.TJBP45	8,778,155-8,782,019	Peroxidase superfamily protein
		Arahy.04	Arahy.9QT5JT	8,814,511-8,818,341	peroxidase 2
		Arahy.04	Arahy.P4M8HI	8,823,665-8,827,291	peroxidase 2
	61118310	Arahy.04	Arahy.46RTPJ	60,972,818-60,975,171	DNA-directed RNA polymerase subunit
		Arahy.04	Arahy.G5K9LY	60,982,842-60,988,324	Tetratricopeptide repeat (TPR)-like superfamily protein
		Arahy.04	Arahy.EW0CJD	61,138,703-61,145,986	serine carboxypeptidase-like 45
	64427766	Arahy.04	Arahy.YI95N7	64,394,914-64,401,961	Acyl-ACP thioesterase
		Arahy.04	Arahy.Z8ERH5	64,488,710-64,490,609	purine permease 5
		Arahy.04	Arahy.WZRS5W	64,587,001-64,591,670	dual specificity protein phosphatase-related
	94095749	Arahy.05	Arahy.ZH7GYP	93,930,286-93,943,166	beta-amyrin synthase isoform X1
		Arahy.05	Arahy.SP0CEZ	93,943,364-93,947,863	microtubule-associated protein TORTIFOLIA1-like isoform X1
		Arahy.05	Arahy.T5AYFK	93,975,921-93,984,387	cycloartenol synthase 1
		Arahy.05	Arahy.Y195CN	94,004,063-94,007,921	cycloartenol synthase 1
		Arahy.05	Arahy.CY3ZTL	94,019,498-94,034,742	beta-amyrin synthase isoform X1
		Arahy.05	Arahy.TJ5BAV	94,034,735-94,041,566	U3 small nucleolar RNA-associated protein 21 n=4 Tax=Filobasidiella/Cryptococcus neoformans species complex RepID=J9VTF0_CRYNH
		Arahy.05	Arahy.A09BTR	94,043,090-94,046,958	receptor-like kinase 1
		Arahy.05	Arahy.CY4FV1	94,064,308-94,067,723	U-box domain-containing protein kinase family protein
		Arahy.05	Arahy.83NCFV	94,067,890-94,069,543	protein kinase family protein
		Arahy.05	Arahy.DM1378	94,072,309-94,073,895	Protein of unknown function (DUF581)
		Arahy.05	Arahy.1S754L	94,075,560-94,080,959	acetyl-CoA carboxylase biotin carboxylase subunit
		Arahy.05	Arahy.F6IJX6	94,082,178-94,084,422	auxin response factor 19
		Arahy.05	Arahy.X8R2JI	94,084,481-94,084,965	auxin response factor 19-like isoform X1
		Arahy.05	Arahy.K8JH1A	94,084,986-94,086,080	auxin response factor 19-like isoform X1
		Arahy.05	Arahy.58VMN1	94,087,242-94,091,970	acetyl-CoA carboxylase biotin carboxylase subunit
		Arahy.05	Arahy.MIX90M	94,093,951-94,101,641	auxin response factor 19
		Arahy.05	Arahy.KHM6P2	94,112,439-94,115,387	Unknown protein
		Arahy.05	Arahy.QSQE7C	94,151,015-94,153,283	methyl-CPG-binding domain protein 02
		Arahy.05	Arahy.YLZA1F	94,164,066-94,165,511	unknown protein
		Arahy.05	Arahy.SU5HAA	94,200,568-94,205,238	ethanolamine-phosphate cytidylyltransferase
		Arahy.05	Arahy.8E646I	94,205,449-94,209,535	Cation transport domain containing protein n=1 Tax=Acanthamoeba castellanii str. Neff RepID=L8HGY1_ACACA
		Arahy.05	Arahy.1U5WXB	94,238,909-94,244,214	Cation transport domain containing protein n=1 Tax=Acanthamoeba castellanii str. Neff RepID=L8HGY1_ACACA
		Arahy.05	Arahy.XD3PB3	94,273,123-94,274,643	transmembrane protein, putative
		Arahy.05	Arahy.5VJG10	94,279,075-94,279,748	Unknown protein
		Arahy.05	Arahy.KFS3KW	94,280,364-94,282,288	B3 domain-containing transcription factor VRN1-like
	22858555	Arahy.07	Arahy.EJKA3Q	22,979,407-22,980,174	Unknown protein
	49041776	Arahy.07	Arahy.1JV035	49,071,758-49,072,320	Unknown protein
		Arahy.07	Arahy.PVN2ZV	49,072,351-49,073,290	2-hydroxyacyl-CoA lyase-like
		Arahy.07	Arahy.YL4ID2	49,203,483-49,210,549	S-adenosyl-L-methionine-dependent methyltransferases superfamily protein
	4186469	Arahy.10	Arahy.L8T4NM	3,996,461-3,997,196	pentatricopeptide (PPR) repeat protein
		Arahy.10	Arahy.TGAQ0L	4,012,698-4,014,467	DEAD-box ATP-dependent RNA helicase-like protein
		Arahy.10	Arahy.UUX1RB	4,016,087-4,018,668	Unknown protein
		Arahy.10	Arahy.SLKX21	4,023,600-4,024,109	CAP (Cysteine-rich secretory proteins, Antigen 5, and Pathogenesis-related 1 protein) superfamily protein
		Arahy.10	Arahy.X6D2K5	4,028,832-4,029,344	CAP (Cysteine-rich secretory proteins, Antigen 5, and Pathogenesis-related 1 protein) superfamily protein
		Arahy.10	Arahy.HENQ4G	4,069,334-4,069,960	chloride channel D
		Arahy.10	Arahy.2SQT6H	4,071,017-4,071,707	Unknown protein
		Arahy.10	Arahy.DUI1VE	4,079,720-4,080,465	CAP (Cysteine-rich secretory proteins, Antigen 5, and Pathogenesis-related 1 protein) superfamily protein
		Arahy.10	Arahy.W0FE3Y	4,081,250-4,081,750	CAP (Cysteine-rich secretory proteins, Antigen 5, and Pathogenesis-related 1 protein) superfamily protein
		Arahy.10	Arahy.LJ3J7D	4,083,370-4,083,791	CAP (Cysteine-rich secretory proteins, Antigen 5, and Pathogenesis-related 1 protein) superfamily protein
		Arahy.10	Arahy.3D8EL1	4,087,942-4,090,695	shaggy-related protein kinase eta-like isoform X3
		Arahy.10	Arahy.EHDD69	4,097,047-4,097,586	CAP (Cysteine-rich secretory proteins, Antigen 5, and Pathogenesis-related 1 protein) superfamily protein
		Arahy.10	Arahy.D66PR5	4,100,364-4,105,040	CAP (Cysteine-rich secretory proteins, Antigen 5, and Pathogenesis-related 1 protein) superfamily protein
		Arahy.10	Arahy.9NLX2S	4,108,388-4,108,912	CAP (Cysteine-rich secretory proteins, Antigen 5, and Pathogenesis-related 1 protein) superfamily protein
		Arahy.10	Arahy.J8AXIX	4,114,681-4,115,208	CAP (Cysteine-rich secretory proteins, Antigen 5, and Pathogenesis-related 1 protein) superfamily protein
		Arahy.10	Arahy.3692I0	4,118,207-4,120,384	CAP (Cysteine-rich secretory proteins, Antigen 5, and Pathogenesis-related 1 protein) superfamily protein
		Arahy.10	Arahy.6N05IH	4,138,568-4,139,068	CAP (Cysteine-rich secretory proteins, Antigen 5, and Pathogenesis-related 1 protein) superfamily protein
		Arahy.10	Arahy.HUGM4D	4,140,957-4,141,460	CAP (Cysteine-rich secretory proteins, Antigen 5, and Pathogenesis-related 1 protein) superfamily protein
		Arahy.10	Arahy.393RCZ	4,156,985-4,157,287	CAP (Cysteine-rich secretory proteins, Antigen 5, and Pathogenesis-related 1 protein) superfamily protein
		Arahy.10	Arahy.B8NNES	4,180,877-4,184,009	receptor-like kinase 1
		Arahy.10	Arahy.A60648	4,196,815-4,197,324	CAP (Cysteine-rich secretory proteins, Antigen 5, and Pathogenesis-related 1 protein) superfamily protein
		Arahy.10	Arahy.VRLT2G	4,199,728-4,205,650	casein kinase I-like 4
		Arahy.10	Arahy.Z151WT	4,209,229-4,209,738	CAP (Cysteine-rich secretory proteins, Antigen 5, and Pathogenesis-related 1 protein) superfamily protein
		Arahy.10	Arahy.8XX2CF	4,216,867-4,217,178	clathrin light chain 1-like
		Arahy.10	Arahy.GA2IW9	4,224,705-4,224,941	CAP, cysteine-rich secretory protein, antigen 5
		Arahy.10	Arahy.JC3GUS	4,226,806-4,227,300	CAP (Cysteine-rich secretory proteins, Antigen 5, and Pathogenesis-related 1 protein) superfamily protein
		Arahy.10	Arahy.B7HE8X	4,234,924-4,235,373	CAP (Cysteine-rich secretory proteins, Antigen 5, and Pathogenesis-related 1 protein) superfamily protein
		Arahy.10	Arahy.D1S4HY	4,254,153-4,254,650	CAP (Cysteine-rich secretory proteins, Antigen 5, and Pathogenesis-related 1 protein) superfamily protein
		Arahy.10	Arahy.DCJ0N1	4,261,793-4,262,822	Unknown protein
		Arahy.10	Arahy.KK761N	4,263,394-4,264,073	CAP (Cysteine-rich secretory proteins, Antigen 5, and Pathogenesis-related 1 protein) superfamily protein
		Arahy.10	Arahy.ZGE9V6	4,268,114-4,268,611	CAP (Cysteine-rich secretory proteins, Antigen 5, and Pathogenesis-related 1 protein) superfamily protein
		Arahy.10	Arahy.KH5CQP	4,270,111-4,271,464	CAP (Cysteine-rich secretory proteins, Antigen 5, and Pathogenesis-related 1 protein) superfamily protein
		Arahy.10	Arahy.GWN11T	4,273,545-4,274,027	CAP (Cysteine-rich secretory proteins, Antigen 5, and Pathogenesis-related 1 protein) superfamily protein
		Arahy.10	Arahy.K279K0	4,287,556-4,288,038	CAP (Cysteine-rich secretory proteins, Antigen 5, and Pathogenesis-related 1 protein) superfamily protein
		Arahy.10	Arahy.0B8THM	4,296,394-4,297,405	CAP (Cysteine-rich secretory proteins, Antigen 5, and Pathogenesis-related 1 protein) superfamily protein
		Arahy.10	Arahy.02UTLC	4,307,353-4,307,775	CAP (Cysteine-rich secretory proteins, Antigen 5, and Pathogenesis-related 1 protein) superfamily protein
		Arahy.10	Arahy.UYX9FH	4,311,900-4,313,591	ATP-dependent zinc metalloprotease FTSH protein
		Arahy.10	Arahy.T997JY	4,316,285-4,324,725	uncharacterized protein At3g49720-like isoform X2
		Arahy.10	Arahy.IXL9K3	4,326,541-4,327,123	Acyl-CoA N-acyltransferases (NAT) superfamily protein
		Arahy.10	Arahy.G1LWM7	4,327,171-4,327,687	histone acetyltransferase MCC1-like
		Arahy.10	Arahy.7UK7IQ	4,335,958-4,339,927	squalene monooxygenase 2
		Arahy.10	Arahy.189H81	4,348,327-4,351,424	DNA ligase 1-like
		Arahy.10	Arahy.AKE21I	4,360,403-4,363,735	proline iminopeptidase
		Arahy.10	Arahy.KWX927	4,377,172-4,381,136	ATP binding/protein serine/threonine kinase
	67723994	Arahy.11	Arahy.BX07LP	67,620,110-67,623,949	26S proteasome non-ATPase regulatory subunit 6
		Arahy.11	Arahy.JHQ7C4	67,626,158-67,633,045	Protein kinase superfamily protein
		Arahy.11	Arahy.3P5RS6	67,722,946-67,727,785	nucleoside diphosphate kinase 2
		Arahy.11	Arahy.DV5N5R	67,722,965-67,723,969	uncharacterized protein LOC100807388 isoform X2
		Arahy.11	Arahy.J4TPMW	68,718,385-68,719,661	1,4-dihydroxy-2-naphthoyl-CoA synthase
		Arahy.11	Arahy.UUY44J	68,834,044-68,865,449	GPI transamidase component PIG-S-related
		Arahy.11	Arahy.3GW0ZH	69,066,471-69,072,437	RNA-binding protein 39-like
		Arahy.11	Arahy.E9E4U6	69,093,273-69,094,701	plasma membrane H+-ATPase
		Arahy.11	Arahy.XK2F15	69,094,782-69,096,578	plasma membrane H+-ATPase
	87089142	Arahy.13	Arahy.B51AEH	86,915,812-86,918,437	uncharacterized protein LOC102661803
		Arahy.13	Arahy.U2WZ8A	86,950,534-86,953,632	uncharacterized protein LOC102665201 isoform X3
		Arahy.13	Arahy.PK5V4W	86,987,893-86,999,830	Ribosome-binding ATPase YchF n=5 Tax=Bacillus RepID=F7Z747_BACC6
	83801701	Arahy.13	Arahy.LC8K5G	83,747,374-83,747,929	peroxisomal ABC transporter 1
		Arahy.13	Arahy.8TQ98L	83,752,562-83,755,339	glycerol-3-phosphate transporter
	17372387	Arahy.13	Arahy.Z0Z3SY	17,173,316-17,179,535	enhancer of polycomb homolog 2-like isoform X2
		Arahy.13	Arahy.I1CX7V	17,245,402-17,248,068	Pentatricopeptide repeat (PPR) superfamily protein
		Arahy.13	Arahy.AS37GI	17,249,252-17,251,016	Unknown protein
		Arahy.13	Arahy.FH5WCV	17,251,094-17,252,248	sulfite oxidase
		Arahy.13	Arahy.2NE4Q7	17,251,821-17,253,819	SAUR-like auxin-responsive protein family
		Arahy.13	Arahy.YSF7LC	17,304,421-17,306,770	DNA mismatch repair MUTS family protein
		Arahy.13	Arahy.KYEU97	17,315,167-17,318,200	C4-dicarboxylate transporter/malic acid transport protein
		Arahy.13	Arahy.S3VQUL	17,355,163-17,357,615	B-cell receptor-associated 31-like
		Arahy.13	Arahy.7P97F6	17,361,976-17,370,312	chromodomain-helicase-DNA-binding protein 1-like isoform X2
		Arahy.13	Arahy.LJ25B0	17,411,298-17,412,529	glycine-rich cell wall structural protein 1-like
		Arahy.13	Arahy.SJMT99	17,480,352-17,481,722	Membrane-associated zinc metalloprotease family protein, expressed n=3 Tax=Oryza RepID=Q84NY6_ORYSJ
		Arahy.13	Arahy.4B15T0	17,498,819-17,502,146	myb transcription factor
	23273713	Arahy.13	Arahy.6SD8L3	23,082,989-23,083,872	serine/threonine-protein phosphatase 7 long form homolog
		Arahy.13	Arahy.HGAZ7D	23,090,442-23,091,197	ethylene-responsive transcription factor 1B
		Arahy.13	Arahy.60EZUA	23,133,671-23,143,246	U11/U12 small nuclear ribonucleoprotein 25 kDa protein-like isoform X7
		Arahy.13	Arahy.J1Z9L2	23,191,913-23,200,020	tyrosine aminotransferase 3
		Arahy.13	Arahy.7D08F5	23,211,661-23,221,902	Reticulon family protein
		Arahy.13	Arahy.PMQ43S	23,251,946-23,253,363	Nucleic acid-binding, OB-fold-like protein
		Arahy.13	Arahy.JHM90T	23,256,237-23,256,608	uncharacterized protein LOC100788648 isoform X3
		Arahy.13	Arahy.2VFR3P	23,308,374-23,309,079	uncharacterized protein LOC102664360
		Arahy.13	Arahy.ULM3VA	23,311,967-23,320,460	26S proteasome regulatory subunit S2 1A
		Arahy.13	Arahy.LFV3BQ	23,363,839-23,366,191	importin-5-like
		Arahy.13	Arahy.BX0P1N	23,369,401-23,378,127	terpene synthase 21
		Arahy.13	Arahy.SI8X9Q	23,387,292-23,394,293	two-component response regulator-like APRR2-like isoform X3
		Arahy.13	Arahy.ZPQX4Z	23,402,022-23,402,505	Unknown protein
		Arahy.13	Arahy.6NK4RZ	23,465,919-23,466,718	uncharacterized protein LOC100812028
	91882550	Arahy.13	Arahy.H7HAX3	91,732,381-91,739,552	CBS domain-containing protein with a domain of unknown function (DUF21)
		Arahy.13	Arahy.TNRR0X	91,744,025-91,751,890	debranching enzyme 1
		Arahy.13	Arahy.I9ZU4J	91,906,513-91,907,331	hypothetical protein
		Arahy.13	Arahy.NH2PDE	91,908,314-91,913,820	Translocon-associated family protein n=1 Tax=Populus trichocarpa RepID=A9PFV9_POPTR
		Arahy.13	Arahy.WJ50EA	91,916,703-91,917,958	Unknown protein
		Arahy.13	Arahy.9Q6XN1	91,921,311-91,926,610	ethanolamine-phosphate cytidylyltransferase
		Arahy.13	Arahy.FV9V0P	91,921,422-91,922,864	unknown protein
		Arahy.13	Arahy.U8P99Q	91,934,914-91,938,008	cysteine synthase C1
		Arahy.13	Arahy.LULC1Z	91,950,271-91,954,186	ATP-binding ABC transporter
		Arahy.13	Arahy.CH5A50	91,954,110-91,961,683	Homeodomain-like transcriptional regulator
		Arahy.13	Arahy.PC8EL3	92,078,974-92,083,335	ATP binding / kinase/ protein kinase/ protein serine/threonine kinase/ protein-tyrosine kinase n=4 Tax=rosids RepID=C5DB54_VITVI
	51951294	Arahy.14	Arahy.N7I060	51,763,156-51,768,696	hypothetical protein
		Arahy.14	Arahy.DL87B7	51,829,249-51,847,435	preprotein translocase subunit SecY
		Arahy.14	Arahy.W45D1N	51,852,246-51,853,480	putative nuclease HARBI1-like
		Arahy.14	Arahy.ZI8HJG	52,107,565-52,107,857	Mitochondrial transcription termination factor family protein, putative isoform 2 n=1 Tax=Theobroma cacao RepID=UPI00042B7E42
	84573006	Arahy.16	Arahy.F9ANIH	84,765,040-84,767,914	nuclear export mediator factor NEMF-like isoform X5
	119791828	Arahy.16	Arahy.0T11RW	119,801,197-119,815,640	ATP binding/valine-tRNA ligase/aminoacyl-tRNA ligase n=4 Tax=Brassicaceae RepID=F4KE63_ARATH
		Arahy.16	Arahy.P1MSVW	119,855,363-119,863,362	cationic amino acid transporter 2
		Arahy.16	Arahy.3PF37K	119,881,494-119,888,481	cationic amino acid transporter 4
		Arahy.16	Arahy.Q8WFXK	119,902,367-119,907,146	Pentatricopeptide repeat (PPR) superfamily protein
		Arahy.16	Arahy.PK5BF1	119,951,978-119,955,645	Ferredoxin--NADP reductase n=3 Tax=Oryza RepID=I1Q824_ORYGL
		Arahy.16	Arahy.ZAN4A4	119,986,622-119,989,970	AP-1 complex subunit sigma-like protein
	122692509	Arahy.16	Arahy.MZ8BA6	122,517,906-122,521,472	uncharacterized protein LOC100778909 isoform X2
		Arahy.16	Arahy.PI20KV	122,529,879-122,532,146	Ulp1 protease family, carboxy-terminal domain protein
		Arahy.16	Arahy.BM10ZA	122,532,876-122,533,061	Unknown protein
		Arahy.16	Arahy.TGP5HN	122,533,095-122,534,042	hypothetical protein
		Arahy.16	Arahy.9R5XSH	122,545,711-122,546,906	pathogenic type III effector avirulence factor Avr AvrRpt-cleavage: cleavage site protein
		Arahy.16	Arahy.S0X8F9	122,580,041-122,594,314	GTP-binding protein-related
		Arahy.16	Arahy.Q3FUVQ	122,588,486-122,589,840	shikimate kinase 1
		Arahy.16	Arahy.N1DYA7	122,594,416-122,594,721	Unknown protein
		Arahy.16	Arahy.KM1SID	122,595,506-122,603,253	4-hydroxybenzoate polyprenyltransferase, mitochondrial-like isoform X5
		Arahy.16	Arahy.MN9CK9	122,652,534-122,657,350	shikimate kinase 1
		Arahy.16	Arahy.UD5YJS	122,658,454-122,663,561	4-alpha-glucanotransferase/amyloplastic protein
		Arahy.16	Arahy.3HN607	122,733,237-122,736,121	uncharacterized protein LOC100793430 isoform X2
		Arahy.16	Arahy.13XKQP	122,785,747-122,787,432	uncharacterized protein LOC100814496
		Arahy.16	Arahy.023W1F	122,790,842-122,792,559	Nse4, component of Smc5/6 DNA repair complex
		Arahy.16	Arahy.WF3AZ6	122,795,679-122,808,455	uncharacterized protein LOC100814496
		Arahy.16	Arahy.YCKM6W	122,808,752-122,823,285	nucleolar MIF4G domain protein
		Arahy.16	Arahy.W08UX8	122,884,710-122,886,615	Unknown protein
		Arahy.16	Arahy.I8ZYWJ	122,888,605-122,890,016	3-ketoacyl-CoA synthase 19-like
	24861124	Arahy.16	Arahy.7SE2GP	24,665,986-24,667,766	basic helix-loop-helix (bHLH) DNA-binding superfamily protein
		Arahy.16	Arahy.L4UE4C	24,706,573-24,707,689	thylakoid membrane phosphoprotein 14 kDa protein
		Arahy.16	Arahy.UGII1Q	24,708,039-24,709,456	O-methyltransferase 1
		Arahy.16	Arahy.GF54Z4	24,749,178-24,756,649	MYB transcription factor MYB114 isoform X2
		Arahy.16	Arahy.7ZN1JI	24,752,725-24,761,374	Protein kinase superfamily protein
		Arahy.16	Arahy.6SQ3H9	24,775,972-24,777,866	soluble inorganic pyrophosphatase
	14468911	Arahy.17	Arahy.YZVC5Q	14,310,474-14,311,616	uncharacterized protein LOC102669061
		Arahy.17	Arahy.N179K0	14,311,665-14,312,152	uncharacterized protein LOC100794155 isoform X2
		Arahy.17	Arahy.QM65TI	14,312,215-14,313,745	uncharacterized protein LOC100817502 isoform X4
		Arahy.17	Arahy.IBN18R	14,313,804-14,316,643	putative nuclease HARBI1-like
		Arahy.17	Arahy.VI2M0K	14,316,930-14,317,685
		Arahy.17	Arahy.GKM8IL	14,331,409-14,332,982	cullin-associated NEDD8-dissociated protein
		Arahy.17	Arahy.F9KBLE	14,337,680-14,338,958	Pentatricopeptide repeat (PPR) superfamily protein
		Arahy.17	Arahy.GI3U76	14,338,998-14,341,335	Pentatricopeptide repeat (PPR) superfamily protein
		Arahy.17	Arahy.91GE99	14,344,302-14,346,361	Unknown protein
		Arahy.17	Arahy.KFRN4K	14,383,152-14,387,538	WD repeat-containing protein 5-like
		Arahy.17	Arahy.PJ9UI9	14,386,388-14,387,497	ribosomal RNA large subunit methyltransferase
		Arahy.17	Arahy.09ZGYD	14,387,764-14,393,329	telomere repeat-binding protein 3-like isoform X2
		Arahy.17	Arahy.A0U2DV	14,402,332-14,409,828	Unknown protein
		Arahy.17	Arahy.FP5V95	14,423,413-14,427,982	bystin-like isoform X2
		Arahy.17	Arahy.425GF3	14,445,173-14,449,435	ferric reduction oxidase 8
		Arahy.17	Arahy.QM32I5	14,495,742-14,498,270	Cell wall protein EXP2 n=1 Tax=Mirabilis jalapa RepID=Q84L40_MIRJA
		Arahy.17	Arahy.U4IPB2	14,498,938-14,506,299	uncharacterized protein LOC100806426 isoform X4
		Arahy.17	Arahy.FVFA1W	14,606,646-14,616,156	granule bound starch synthase
	5025554	Arahy.17	Arahy.94900P	4,823,678-4,829,268	protein MEI2-like 2-like isoform X3
		Arahy.17	Arahy.X44LXV	4,829,430-4,832,528	ribose-phosphate pyrophosphokinase
		Arahy.17	Arahy.U93XWB	4,838,104-4,840,994	glycerol-3-phosphate acyltransferase 1
		Arahy.17	Arahy.FHHV9X	4,856,844-4,857,791	global transcription factor group protein
		Arahy.17	Arahy.X0J697	4,863,256-4,864,542	UPF0481 protein
		Arahy.17	Arahy.N54FIB	4,867,930-4,868,724	uncharacterized protein LOC100782617 isoform X4
		Arahy.17	Arahy.II6AZW	4,869,685-4,870,248	probable CCR4-associated factor 1 homolog 11-like
		Arahy.17	Arahy.UR7S4B	4,874,024-4,874,377	probable CCR4-associated factor 1 homolog 11
		Arahy.17	Arahy.NC1EXA	4,875,178-4,876,658	UPF0481 protein
		Arahy.17	Arahy.EI0XMN	4,877,212-4,882,907	Disease resistance protein (CC-NBS-LRR class) family
		Arahy.17	Arahy.02DIMQ	4,882,507-4,883,449	UPF0481 protein
		Arahy.17	Arahy.63FMKD	4,898,276-4,901,991	glucan endo-1,3-beta-glucosidase 12-like
		Arahy.17	Arahy.SHC736	4,904,879-4,906,486	Pentatricopeptide repeat (PPR-like) superfamily protein
		Arahy.17	Arahy.288B0N	4,907,024-4,907,818	putative DNA-binding protein ESCAROLA-like
		Arahy.17	Arahy.QBP2NG	4,914,286-4,921,315	Outward rectifying potassium channel protein
		Arahy.17	Arahy.G50Y2D	4,918,422-4,923,604	uncharacterized protein LOC100777386 isoform X2
		Arahy.17	Arahy.LA4AI5	4,942,078-4,943,769	probable WRKY transcription factor 28-like
		Arahy.17	Arahy.4TM2VA	4,956,605-4,961,332	Protein kinase superfamily protein
		Arahy.17	Arahy.A53T08	4,974,366-4,974,623	transmembrane protein, putative
		Arahy.17	Arahy.B1S40C	4,975,512-4,978,352	suppressor protein SRP40-like isoform X3
		Arahy.17	Arahy.3I6JR3	4,979,951-4,984,521	Golgi transport complex protein-related
		Arahy.17	Arahy.YJ6A8I	4,986,182-4,986,724	hypothetical protein
		Arahy.17	Arahy.1IA0LX	5,014,674-5,022,820	GDSL esterase/lipase plant-like protein
		Arahy.17	Arahy.226PX6	5,024,406-5,026,216	uncharacterized protein LOC100778027 isoform X2
		Arahy.17	Arahy.FJ8JNY	5,026,837-5,028,819	putative ferric-chelate reductase 1-like isoform X2
		Arahy.17	Arahy.GD87LF	5,029,825-5,032,341	60S ribosomal protein L18A-1
		Arahy.17	Arahy.GD47LP	5,035,484-5,037,915	Eukaryotic aspartyl protease family protein
		Arahy.17	Arahy.JRP0UJ	5,048,232-5,054,900	NOL1/NOP2/sun family protein
		Arahy.17	Arahy.1RK1ZX	5,053,885-5,054,379	hypothetical protein
		Arahy.17	Arahy.GW18TL	5,063,503-5,064,802	GDSL esterase/lipase n=1 Tax=Medicago truncatula RepID=G7IY44_MEDTR
		Arahy.17	Arahy.I7WXBP	5,064,697-5,068,566	4-hydroxyphenylpyruvate dioxygenase
		Arahy.17	Arahy.THQ3DC	5,070,237-5,079,687	anaphase-promoting complex subunit 5
		Arahy.17	Arahy.9ACL7S	5,080,428-5,084,525	SCF ubiquitin ligase, SKP1 component
		Arahy.17	Arahy.MU3IQ8	5,110,389-5,114,474	SCF ubiquitin ligase, SKP1 component
		Arahy.17	Arahy.V793IC	5,134,137-5,135,473	DNA repair and recombination RAD54-like protein
		Arahy.17	Arahy.LH8IQX	5,153,773-5,156,066	SCF ubiquitin ligase, SKP1 component
		Arahy.17	Arahy.FMIZ2E	5,168,020-5,175,476	Unknown protein
		Arahy.17	Arahy.UVIL8N	5,177,143-5,179,701	Ulp1 protease family, carboxy-terminal domain protein
		Arahy.17	Arahy.3YJ1U6	5,190,279-5,195,316	Pleckstrin homology (PH) domain-containing protein
		Arahy.17	Arahy.UK39BN	5,194,800-5,198,834	putative NAC domain-containing protein 94-like
		Arahy.17	Arahy.D9N5NI	5,203,269-5,205,430	Unknown protein
		Arahy.17	Arahy.RTWQ9V	5,205,525-5,206,037	sulfate transporter 1
T9	78055673	Arahy.02	Arahy.RNL7K1	77,885,194-77,891,411	Unknown protein
		Arahy.02	Arahy.1TW0Z8	77,911,297-77,921,964	ion channel pollux-like protein
		Arahy.02	Arahy.H0QU5C	77,932,829-77,936,217	Unknown protein
		Arahy.02	Arahy.7J7E83	78,015,452-78,023,173	acylamino-acid-releasing enzyme-like protein, putative
		Arahy.02	Arahy.PSR5PH	78,088,070-78,088,645	zinc finger MYM-type protein 1-like
		Arahy.02	Arahy.EE1039	78,156,649-78,160,954	peroxisomal 3-ketoacyl-CoA thiolase 3
		Arahy.02	Arahy.ASV3U0	78,179,300-78,182,372	DNA replication complex GINS SLD5-like protein
		Arahy.02	Arahy.3ITB8I	78,201,753-78,209,992	Protein kinase superfamily protein
	105916420	Arahy.04	Arahy.0XL2Q0	105,718,589-105,722,277	Unknown protein
		Arahy.04	Arahy.WS4JL8	105,751,550-105,753,984	protein LURP-one-related 15-like
		Arahy.04	Arahy.GEUR3Z	105,754,846-105,757,867	replication factor-A carboxy-terminal domain protein
		Arahy.04	Arahy.AGG0WC	105,777,987-105,780,936	protein LURP-one-related 15-like
		Arahy.04	Arahy.LDS6QA	105,786,169-105,787,809	protein LURP-one-related 15-like
		Arahy.04	Arahy.7U9J2V	105,793,541-105,793,798	uncharacterized protein LOC102663671 isoform X5
		Arahy.04	Arahy.H6FGN8	105,795,057-105,797,005	alpha/beta hydrolase domain-containing protein 13-like
		Arahy.04	Arahy.6VAW0P	105,891,336-105,893,719	protein LURP-one-related 15-like
		Arahy.04	Arahy.8WTZ4N	105,926,512-105,934,012	ORF64c n=1 Tax=Pinus koraiensis RepID=UPI000017DDE6
		Arahy.04	Arahy.TYE7C9	105,937,160-105,938,051	protein LURP-one-related 15-like
		Arahy.04	Arahy.2UM9MH	105,942,412-105,944,855	protein LURP-one-related 15-like
		Arahy.04	Arahy.1L601T	106,038,885-106,044,584	ENTH/VHS/GAT family protein
		Arahy.04	Arahy.D1231E	106,044,811-106,057,834	regulatory-associated protein of TOR 1-like isoform X1
	111900912	Arahy.04	Arahy.7UHE22	111,764,913-111,770,485	microtubule-associated protein 65-4
		Arahy.04	Arahy.V729I7	112,000,992-112,010,597	brefeldin A-inhibited guanine nucleotide-exchange protein
		Arahy.04	Arahy.ZG9BLK	112,014,379-112,026,708	ATP binding microtubule motor family protein
		Arahy.04	Arahy.J1YDVJ	112,067,966-112,068,556	glycine-rich RNA-binding protein 4
		Arahy.04	Arahy.40LNQG	112,098,938-112,101,938	4-hydroxy-tetrahydrodipicolinate synthase
	119003542	Arahy.04	Arahy.7UHE22	111,764,913-111,770,485	microtubule-associated protein 65-4
		Arahy.04	Arahy.V729I7	112,000,992-112,010,597	brefeldin A-inhibited guanine nucleotide-exchange protein
		Arahy.04	Arahy.ZG9BLK	112,014,379-112,026,708	ATP binding microtubule motor family protein
		Arahy.04	Arahy.J1YDVJ	112,067,966-112,068,556	glycine-rich RNA-binding protein 4
		Arahy.04	Arahy.40LNQG	112,098,938-112,101,938	4-hydroxy-tetrahydrodipicolinate synthase
	83801701	Arahy.13	Arahy.LC8K5G	83,747,374-83,747,929	peroxisomal ABC transporter 1
		Arahy.13	Arahy.8TQ98L	83,752,562-83,755,339	glycerol-3-phosphate transporter
	6136617	Arahy.17	Arahy.CV55AI	5,940,190-5,941,970	LRR and NB-ARC domain disease resistance protein
		Arahy.17	Arahy.87PIUS	5,941,993-5,943,973	LRR and NB-ARC domain disease resistance protein
		Arahy.17	Arahy.PDEG0B	5,944,001-5,944,552	LRR and NB-ARC domain disease resistance protein
		Arahy.17	Arahy.7R7ZTH	5,945,077-5,947,686	Pentatricopeptide repeat (PPR) superfamily protein
		Arahy.17	Arahy.W5BQ9H	5,948,772-5,954,100	proline iminopeptidase
		Arahy.17	Arahy.4Q1DLP	5,966,856-5,969,738	urease accessory protein F
		Arahy.17	Arahy.S2GGLU	5,971,672-5,974,981	Protein kinase superfamily protein
		Arahy.17	Arahy.6TK8TS	5,981,429-5,983,822	Pentatricopeptide repeat (PPR) superfamily protein
		Arahy.17	Arahy.YB3T89	5,997,478-5,999,594	Protein kinase superfamily protein
		Arahy.17	Arahy.7S13SW	5,999,674-6,000,405	Protein kinase superfamily protein
		Arahy.17	Arahy.IA378M	6,029,421-6,030,536	F-box protein SKIP2-like
		Arahy.17	Arahy.V07RCD	6,048,383-6,049,446	urease accessory protein UreF
		Arahy.17	Arahy.BW18VB	6,050,072-6,050,497	DnaJ/Hsp40 cysteine-rich domain superfamily protein, putative n=1 Tax=Theobroma cacao RepID=UPI00042B1CE6
		Arahy.17	Arahy.I0AKGU	6,066,092-6,068,587	Pentatricopeptide repeat (PPR) superfamily protein
		Arahy.17	Arahy.9P13F7	6,127,828-6,130,031	PENTATRICOPEPTIDE REPEAT 596
		Arahy.17	Arahy.HH45UC	6,133,949-6,135,889	urease accessory protein UreF
		Arahy.17	Arahy.X98I40	6,159,949-6,160,335	serine/threonine-protein phosphatase 7 long form homolog
		Arahy.17	Arahy.YX28W3	6,160,381-6,160,659	serine/threonine-protein phosphatase 7 long form homolog
		Arahy.17	Arahy.6847YK	6,164,347-6,165,237	Pentatricopeptide repeat (PPR) superfamily protein
		Arahy.17	Arahy.V5U7H6	6,178,214-6,178,534	unknown protein
		Arahy.17	Arahy.IJVD3H	6,195,756-6,201,837	Protein kinase superfamily protein
		Arahy.17	Arahy.Q262DG	6,202,036-6,205,366	Protein kinase superfamily protein
		Arahy.17	Arahy.QU52XI	6,232,110-6,234,932	flocculation protein FLO11-like isoform X4
		Arahy.17	Arahy.EY5MJ2	6,257,030-6,261,544	protein kinase family protein
		Arahy.17	Arahy.9N9T88	6,273,427-6,277,297	ABC-type transport system protein
		Arahy.17	Arahy.7GTL8A	6,277,807-6,281,679	Polynucleotidyl transferase, ribonuclease H-like superfamily protein
		Arahy.17	Arahy.XYY1GX	6,282,759-6,284,871	probable calcium-binding protein CML20
		Arahy.17	Arahy.F8C5M7	6,287,295-6,289,280	probable calcium-binding protein CML20
		Arahy.17	Arahy.MH0DCU	6,292,316-6,297,717	SNF1-related kinase regulatory subunit beta-2
		Arahy.17	Arahy.207GSN	6,329,402-6,333,327	abscisic acid responsive element-binding factor 1
	6170139	Arahy.17	Arahy.S2GGLU	5,971,672-5,974,981	Protein kinase superfamily protein
		Arahy.17	Arahy.6TK8TS	5,981,429-5,983,822	Pentatricopeptide repeat (PPR) superfamily protein
		Arahy.17	Arahy.YB3T89	5,997,478-5,999,594	Protein kinase superfamily protein
		Arahy.17	Arahy.7S13SW	5,999,674-6,000,405	Protein kinase superfamily protein
		Arahy.17	Arahy.IA378M	6,029,421-6,030,536	F-box protein SKIP2-like
		Arahy.17	Arahy.V07RCD	6,048,383-6,049,446	urease accessory protein UreF
		Arahy.17	Arahy.BW18VB	6,050,072-6,050,497	DnaJ/Hsp40 cysteine-rich domain superfamily protein, putative n=1 Tax=Theobroma cacao RepID=UPI00042B1CE6
		Arahy.17	Arahy.I0AKGU	6,066,092-6,068,587	Pentatricopeptide repeat (PPR) superfamily protein
		Arahy.17	Arahy.9P13F7	6,127,828-6,130,031	PENTATRICOPEPTIDE REPEAT 596
		Arahy.17	Arahy.HH45UC	6,133,949-6,135,889	urease accessory protein UreF
		Arahy.17	Arahy.X98I40	6,159,949-6,160,335	serine/threonine-protein phosphatase 7 long form homolog
		Arahy.17	Arahy.YX28W3	6,160,381-6,160,659	serine/threonine-protein phosphatase 7 long form homolog
		Arahy.17	Arahy.6847YK	6,164,347-6,165,237	Pentatricopeptide repeat (PPR) superfamily protein
	118558032	Arahy.20	Arahy.RU9RLH	118,360,506-118,362,958	Ankyrin repeat family protein
		Arahy.20	Arahy.XZI96J	118,443,498-118,449,133	glutamate receptor 2.8
		Arahy.20	Arahy.J2K13M	118,456,154-118,458,101	putative nuclease HARBI1-like
		Arahy.20	Arahy.N9ETCW	118,487,328-118,488,397	putative nuclease HARBI1-like
		Arahy.20	Arahy.35R4A4	118,488,460-118,489,125	Myb/SANT-like DNA-binding domain protein
		Arahy.20	Arahy.BE03Q5	118,587,059-118,587,338	40S ribosomal protein S8
		Arahy.20	Arahy.DAV6SS	118,603,103-118,609,893	glutamate receptor 2.9
		Arahy.20	Arahy.I5UB9Z	118,613,295-118,618,860	glutamate receptor 2.9
		Arahy.20	Arahy.IKLL4G	118,613,308-118,624,110	Signal transduction histidine kinase
		Arahy.20	Arahy.SFFA6L	118,691,289-118,696,357	ubiquitin carboxyl-terminal hydrolase 18-like isoform X2
